# 1 **Supporting young people through the COVID-19 pandemic** 2 **and beyond: A multi-site qualitative longitudinal study**

3 Short title: Impacts of COVID-19 on young people

4 **AUTHORS:** Madelyn Whyte<sup>1</sup>, Emily Nichol<sup>2</sup>, Lisa D. Hawke<sup>2,3</sup>, Kelli Wuerth<sup>1</sup>, Meaghan  
5 Quinlan-Davidson<sup>2</sup>, Aileen O'Reilly<sup>4,5</sup>, Joseph Duffy<sup>4</sup>, Steve Mathias<sup>1,6,8,9</sup>, JL Henderson<sup>2,3</sup>, Skye  
6 Barbic<sup>1,6-10</sup>

7  
8 <sup>1</sup> Foundry, 1045 Howe Street, Vancouver, British Columbia V6Z 2A9, Canada

9 <sup>2</sup> Centre for Addition and Mental Health, 1001 Queen Street, Toronto, Ontario M6J 1H4, Canada

10 <sup>3</sup> Department of Psychiatry, University of Toronto, 250 College Street, Toronto, Ontario M5T  
11 1R8, Canada

12 <sup>4</sup> Jigsaw – The National Centre for Youth Mental Health, 16 Westland Square, Pearse Street,  
13 Dublin D02 K535, Ireland

14 <sup>5</sup> Department of Psychology, University College Dublin, Belfield, Dublin 4, D04 V1W8 Ireland

15 <sup>6</sup> Providence Research, 10<sup>th</sup> Floor-1190 Hornby Street, Vancouver, British Columbia V6Z 2K5,  
16 Canada

17 <sup>7</sup> Centre for Advancing Health Outcomes, 570-1081 Burrard Street, Vancouver, British  
18 Columbia V6Z 1Y6, Canada

19 <sup>8</sup> Faculty of Medicine, 317-2194 Health Sciences Mall, University of British Columbia,  
20 Vancouver, British Columbia V6T 1Z3, Canada

21 <sup>9</sup> Department of Psychiatry, 2255 Wesbrook Mall, University of British Columbia, Vancouver,  
22 British Columbia V6T 2A1, Canada

23 <sup>10</sup> Department of Occupational Science and Occupational Therapy, T325-2211 Wesbrook Mall,  
24 University of British Columbia, Vancouver, British Columbia V6T 2A1, Canada

25

26

27

28 **CORRESPONDING AUTHOR:** Skye Barbic

29 **Dr. Skye Pamela Barbic**, PhD, Reg. O.T.(BC)

30 Associate Professor, Scientist

31 Occupational Science and Occupational Therapy | Faculty of Medicine

32 The University of British Columbia | Vancouver Campus

33 T325 - 2211 Wesbrook Mall | *Musqueam Territory*/ Vancouver British Columbia | V6T 2A1

34 Cell: 778 846 6134 | Fax 604 822 7624

35 email: [skye.barbic@ubc.ca](mailto:skye.barbic@ubc.ca) | twitter: [skye\\_barbic](#)

36

37

38

## 39 **Abstract**

40           Throughout the COVID-19 pandemic, youth have experienced substantial stress due to  
41 abrupt changes in education, finances, and social life, compounding pre-existing stressors. With  
42 youth (ages 15-26) often at critical points in development, they are vulnerable to long-term  
43 mental health challenges brought on by pandemic trauma. To identify youth experiences  
44 throughout the pandemic and examine changes over time, we conducted semi-structured  
45 interviews among n=141 youth in two Canadian provinces (Ontario and British Columbia) and  
46 across the country of Ireland at three time points over the course of more than one year (August  
47 2020-October 2021). We conducted a qualitative longitudinal analysis using an inductive content  
48 approach. Categories identified were (1) coping with hardship; (2) opportunities for growth; (3)  
49 adapting to new ways of accessing services; (4) mixed views on the pandemic: attitudes,  
50 behaviour, and perception of policy response; (5) navigating COVID-19 information; (6)  
51 transitioning to life after the pandemic; and (7) youth-led recommendations for government and  
52 service response. The findings also reveal trends in health and wellness in accordance with  
53 prolonged periods of lockdown, changes in weather, and return to normalcy after the availability  
54 of COVID-19 vaccines. Key recommendations from youth include incorporating youth voice  
55 into decision making, communicating public health information effectively to youth, enhancing  
56 service delivery post-pandemic, and planning for future pandemics. These results provide  
57 insights into the extensive longitudinal impacts of the COVID-19 pandemic on young people  
58 across three geographical locations. Including youth in decision making for future pandemics or  
59 public health emergencies is critical.

60

## 61 **Introduction**

62           Researchers have long studied the relationship between risk and resilience to determine  
63 ways to promote positive health outcomes in trauma-exposed youth [1]. Literature exploring the  
64 impacts of terrorism and natural disasters has uncovered ripple effects for those exposed to  
65 traumatic events in history. Studies on youth mental health symptomology following the 9/11  
66 terrorist attacks revealed links between direct exposure and heightened rates of post-traumatic  
67 stress disorder [2–4]. Similarly, data on youth affected by Hurricane Katrina found higher rates  
68 of depression and anxiety in the years following the disaster, with secondary stressors of loss of  
69 home and financial strain compounding mental turmoil [5,6].

70           As with discrete traumatic events, the COVID-19 pandemic presented unique challenges for  
71 youth (defined here as ages 15-26 years) [7]. Youth reported disruptions in accessing social and  
72 recreational services and services for their mental and physical health [8]. For example, while  
73 mental health and substance use services quickly pivoted to virtual service delivery modalities,  
74 many end users reported not receiving needed services [8,9]. Acute effects of the COVID-19  
75 pandemic on youth include high rates of stress [10–12] and interpersonal challenges [13],  
76 gendered differences in mental health status [12,14–17], and mixed effects on substance use [18–  
77 20]. Youth also experienced hardships with schooling and academic performance [21–24], with  
78 the transition to virtual learning posing challenges for many young people who had difficulties  
79 adjusting to a self-directed learning style and lack of supports [24]. Furthermore, the pandemic-  
80 related restrictions resulted in increased unemployment rates for youth ages 15-24 in all  
81 countries including Canada and Ireland, leading to financial strain and concerns about the future  
82 [8,25]. Exposure to heightened stress through sudden risk of infection, school closures, financial

83 strain, isolation, and an increasingly polarized political climate in the early stages of the  
84 pandemic created a tumultuous environment with the potential to affect lifetime developmental  
85 trajectories [10,11,26].

86 Quantitative longitudinal studies of youth mental health and wellbeing during the  
87 COVID-19 pandemic have suggested ongoing negative impacts of the pandemic as a whole and  
88 across many mental health and wellbeing variables [16,17,20,27–29]. Stress, anxiety, and  
89 depression increased among youth during the pandemic, while general wellness and positive  
90 health behaviors such as physical activity declined [27,28]. However, there is a lack of  
91 qualitative, longitudinal literature examining youth experiences during and perceptions of the  
92 COVID-19 pandemic and response. An in-depth exploration of youth experiences during the  
93 pandemic is required to gain insight into their mental health experiences, perspectives on public  
94 health measures, hopes and aspirations for the future, and recommendations for the post-  
95 pandemic recovery and future outbreaks, pandemics, and public health crises.

96 To gain insights into the ongoing experiences of youth during the pandemic  
97 internationally and understand how to best meet their needs going forward, we conducted a  
98 longitudinal qualitative study during the pandemic. Our objectives were to (1) explore youth  
99 experiences during COVID-19 at three time points and in three regions (two provinces in  
100 Canada: British Columbia and Ontario, and the country of Ireland) to determine ongoing impacts  
101 of the pandemic on mental health and wellbeing, and (2) offer youth-oriented recommendations  
102 for government and service response.

## 103 **Methods**

## 104 **Study sample**

105 We recruited participants for this multi-phase longitudinal study from three geographic  
106 locations: Ireland and two Canadian provinces [British Columbia (BC) and Ontario (ON)].  
107 Recruitment procedures varied slightly by site as described below. Ethical approval for this study  
108 was provided by Jigsaw’s Research Ethics Committee (JREC/2020/004), the Centre for  
109 Addiction and Mental Health Research Ethics Board (046-2020), and the University of British  
110 Columbia Behavioural Ethics Research Board (H20-01537).

111 **Ireland.** In Ireland, a mental health seeking sample was recruited from Jigsaw services.  
112 Jigsaw – the National Centre for Youth Mental Health is an early intervention integrated mental  
113 health service in Ireland that aims to support youth aged 12 to 25 with their mental health and  
114 wellbeing [30]. Clinicians invited youth ages 16-25 (with consent from parents/guardians, if  
115 under 18) who resided in Ireland and used Jigsaw’s brief intervention services to participate in  
116 the study, and, with consent, youths’ contact details were shared with a member of the research  
117 team. An invitation to take part in the study was also emailed to all youth registered for Jigsaw’s  
118 online synchronous chat support service who had provided consent to be contacted for research  
119 purposes. No honorarium was offered to participants.

120 **Ontario (ON), Canada.** In ON, youth ages 14-28 who were participating in a larger  
121 longitudinal quantitative study on mental health and COVID-19 at the Centre of Mental Health  
122 and Addictions (CAMH) [31] were asked for consent to be contacted for this sub-study. CAMH  
123 is the largest mental health teaching hospital in Canada, providing a range of clinical services for  
124 all ages. The study included youth recruited from three clinical studies and one non-clinical  
125 study [32–34]. Among those who provided consent, emails were sent to potential participants,

126 and purposive sampling was carried out to include a diverse sample of youth in this sub-study.  
127 Thirty participants were recruited from the clinical sample, and thirty-one participants were  
128 recruited from the non-clinical sample, with the goal of representing both cohorts and a wide  
129 range of demographic characteristics. Participants received an email message inviting them to  
130 participate. Participants were paid a \$30 honorarium for each interview.

131 **British Columbia (BC), Canada.** In BC, a Foundry-led social media campaign was  
132 developed with youth and launched to recruit diverse youth ages 16-24 who resided in BC.  
133 Foundry is an integrated youth services initiative for youth ages 12-24 that provides support in  
134 person and virtually through a single access point for multiple service streams, including mental  
135 health [35]. Among those who indicated interest in the study, purposive sampling was carried  
136 out, and a diverse sample of youth from across the province was invited to the consent phase of  
137 the study. Two groups were recruited: A clinical group (n=30) who had accessed Foundry  
138 services in the past 12 months, and a non-clinical group (n=30) who had not accessed Foundry  
139 services. As with ON, participants in BC were paid a \$30 honorarium for each interview.

## 140 **Consent and interview procedures**

141 Data collection procedures at each site varied slightly. Youth provided verbal or written  
142 informed assent/consent to their data being collected and stored for research purposes. In cases  
143 where youth could not legally consent due to jurisdictional laws, consent was received from their  
144 parent/guardian. Participants were informed that all questions were optional, and that they could  
145 end the interview at any time. Participants were followed up with via email. The interview  
146 schedule is reported in Table 1.

147 **Table 1.** Interview schedule across all sites.

|                         | <b>T1</b>                       | <b>T2</b>                | <b>T3</b>                   |
|-------------------------|---------------------------------|--------------------------|-----------------------------|
| <b>Ireland</b>          | November 2020 –<br>January 2021 | February – March<br>2021 | August 2021                 |
| <b>Ontario</b>          | August 2020                     | March – April 2021       | September – October<br>2021 |
| <b>British Columbia</b> | November 2020 –<br>January 2021 | March – June 2021        | August – October<br>2021    |

148

149           In ON, demographic data (e.g., age, gender identity, race/ethnicity, employment status)  
150 and psychosocial data were collected from the initial quantitative survey [36]. Interviews were  
151 conducted by phone or through a secure video conferencing system, WebEx (Cisco Systems, San  
152 Jose, California), hosted on a secure institutional server. Interviews were digitally recorded and  
153 transcribed verbatim by either a research staff member or a professional transcription agency.  
154 Participants were assigned unique participant IDs, and identifying information was removed  
155 during transcription. In Ireland and BC, demographic surveys were completed electronically at  
156 the start of all three time points. In BC, psychosocial questions were completed as part of this  
157 survey. Semi-structured interviews were conducted through Zoom (Zoom Video Corporation,  
158 San Jose, California) by a member of the research team. In BC, this research team for interviews  
159 consisted of a research coordinator and seven youth research assistants, and in Ireland the team  
160 consisted of two youth research assistants. Interviews were recorded and transcribed verbatim by  
161 two youth research assistants in BC and two youth research assistants in Ireland. Unique  
162 participant IDs were given and identifying information was removed from the transcripts to  
163 maintain confidentiality.

164 A copy of the semi-structured interview guides used across all sites is contained in Appendix A.

165 The engagement of young people was a core component of this study. Youth co-  
166 researchers were employed at each site to support all elements of the research process and were  
167 provided with training and supervision by the lead researchers. In addition, youth reference and  
168 co-researcher groups were consulted on various aspects of the project across the three study sites,  
169 including co-developing the recruitment materials and interview questions, interpreting and  
170 validating the findings, and contributing to other knowledge translation materials [37,38].

## 171 **Analysis**

172 We employed inductive content analysis, which involved reading and re-reading the data  
173 (familiarisation); identifying broad categories; developing and refining subcategories and fine-  
174 grained codes; and collating and interpreting the data to generate succinct categories and  
175 subcategories [39]. NVivo 12 Software [40] was used to support data analysis. This process was  
176 iterative, with many drafts of refinements until an accurate depiction of the data was captured  
177 [39]. At the intra-site level, the research team met weekly to ensure a mutual understanding of  
178 code definitions and coded two transcripts together for each time point. At the inter-site level, all  
179 team members met weekly to discuss discrepancies and refine codes and the coding framework.

## 180 **Results**

### 181 **Demographics**

182 As shown in Table 2, a total of 141 participants ages 14-26 years took part in the study at  
183 T1 (BC n=59, ON n=61, Ireland n=21). Retention was 87% at T2 (n=123 total; BC n=50, ON  
184 n=56, Ireland n=17), and 78% at T3 (n=110 total; BC n=43, ON n=53, Ireland n=14).

185 **Table 2.** Sociodemographic characteristics of participants included in the study at T1.

|                              | <b>BC (n=59)</b> | <b>ON (n=61)</b> | <b>Ireland (n=21)</b> | <b>Total (n=141)</b> |
|------------------------------|------------------|------------------|-----------------------|----------------------|
| <b>Age (years)</b>           |                  |                  |                       |                      |
| 14-17                        | 12 (20.3%)       | 4 (6.6%)         | 7 (33.3%)             | 23 (16.3%)           |
| 18-21                        | 27 (45.8%)       | 30 (49.2%)       | 10 (47.6%)            | 67 (47.5%)           |
| 22-25                        | 20 (33.9%)       | 26 (42.6%)       | 4 (19.1%)             | 50 (35.5%)           |
| 26                           | 0 (0%)           | 1 (1.6%)         | 0 (0%)                | 1 (0.7%)             |
| <b>Gender</b>                |                  |                  |                       |                      |
| Boys/Men                     | 12 (20.3%)       | 22 (36.1%)       | 2 (9.5%)              | 36 (25.5%)           |
| Girls/Women                  | 43 (72.9%)       | 29 (47.5%)       | 18 (85.7%)            | 90 (63.8%)           |
| Non-binary                   | 0 (0%)           | 6 (9.8%)         | 1 (4.8%)              | 7 (5.0%)             |
| Transgender                  | 1 (1.7%)         | 1 (1.6%)         | 0 (0%)                | 2 (1.4%)             |
| Another gender identity      | 3 (5.1%)         | 3 (4.9%)         | 0 (0%)                | 6 (4.3%)             |
| <b>Race/Ethnicity</b>        |                  |                  |                       |                      |
| Caucasian                    | 25 (42.4%)       | 24 (39.3%)       | 17 (81.0%)            | 66 (46.8%)           |
| Black                        | 0 (0%)           | 6 (9.8%)         | 2 (9.5%)              | 8 (5.7%)             |
| Asian                        | 18 (30.5%)       | 20 (32.8%)       | 2 (9.5%)              | 40 (28.4%)           |
| Latin American               | 1 (1.70%)        | 1 (1.6%)         | 0 (0.0%)              | 2 (1.4%)             |
| Mixed heritage               | 8 (13.6%)        | 8 (13.1%)        | 0 (0.0%)              | 16 (11.4%)           |
| Ashkenazi Jewish             | 0 (0.0%)         | 1 (1.6%)         | 0 (0.0%)              | 1 (0.7%)             |
| Middle Eastern/North African | 5 (8.5%)         | 0 (0.0%)         | 0 (0.0%)              | 5 (3.6%)             |
| Métis                        | 1 (1.7%)         | 0 (0.0%)         | 0 (0.0%)              | 1 (0.7%)             |
| Missing                      | 1 (1.7%)         | 1 (1.7%)         | 0 (0.0%)              | 2 (1.4%)             |

187 Table 3 outlines psychosocial factors documented across time-points in BC and ON. Due  
 188 to resource limitations, participants from Ireland did not complete the psychosocial surveys.

189 **Table 3.** Psychosocial characteristics across timepoints in BC and ON.\*

|                                | BC            |               |               | ON            |               |               |
|--------------------------------|---------------|---------------|---------------|---------------|---------------|---------------|
| <b>Employment Status</b>       | <b>T1</b>     | <b>T2</b>     | <b>T3</b>     | <b>T1</b>     | <b>T2</b>     | <b>T3</b>     |
|                                | <b>(n=59)</b> | <b>(n=41)</b> | <b>(n=27)</b> | <b>(n=60)</b> | <b>(n=54)</b> | <b>(n=51)</b> |
| <b>Employed</b>                | 10<br>(17.0%) | 9<br>(22.0%)  | 7<br>(25.9%)  | 6<br>(10.0%)  | 14<br>(25.9%) | 16<br>(31.4%) |
| <b>In school</b>               | 24<br>(40.7%) | 14<br>(34.1%) | 4<br>(14.8%)  | 35<br>(58.3%) | 16<br>(29.6%) | 12<br>(23.5%) |
| <b>Both</b>                    | 23<br>(39.0%) | 16<br>(39.0%) | 12<br>(44.4%) | 9<br>(15.0%)  | 19<br>(45.2%) | 20<br>(39.2%) |
| <b>Neither</b>                 | 2 (3.4%)      | 2 (4.9%)      | 4<br>(14.8%)  | 10<br>(16.7%) | 5 (9.3%)      | 3 (5.9%)      |
| <b>Physical Health</b>         | <b>T1</b>     | <b>T2</b>     | <b>T3</b>     | <b>T1</b>     | <b>T2</b>     | <b>T3</b>     |
|                                | <b>(n=59)</b> | <b>(n=41)</b> | <b>(n=27)</b> | <b>(n=59)</b> | <b>(n=54)</b> | <b>(n=51)</b> |
| <b>Poor to Fair</b>            | 9<br>(15.3%)  | 8<br>(19.5%)  | 3<br>(11.1%)  | 19<br>(32.2%) | 20<br>(37.0%) | 18<br>(35.3%) |
| <b>Good to Excellent</b>       | 50<br>(84.8%) | 33<br>(80.5%) | 24<br>(88.9%) | 40<br>(67.8%) | 34<br>(62.7%) | 33<br>(64.7%) |
| <b>Mental/Emotional Health</b> | <b>T1</b>     | <b>T2</b>     | <b>T3</b>     | <b>T1</b>     | <b>T2</b>     | <b>T3</b>     |
|                                | <b>(n=59)</b> | <b>(n=41)</b> | <b>(n=27)</b> | <b>(n=59)</b> | <b>(n=55)</b> | <b>(n=51)</b> |
| <b>Poor to Fair</b>            | 33<br>(55.9%) | 19<br>(46.3%) | 10<br>(37.0%) | 28<br>(47.5%) | 23<br>(41.8%) | 22<br>(43.1%) |

|                          |         |         |         |         |         |         |
|--------------------------|---------|---------|---------|---------|---------|---------|
| <b>Good to Excellent</b> | 26      | 22      | 17      | 31      | 32      | 29      |
|                          | (44.1%) | (53.7%) | (63.0%) | (52.5%) | (58.2%) | (56.9%) |

190 \* Some participants did not fill in demographics at all time points and some surveys were partially complete.

## 191 **Content categories**

192 Table 4 outlines seven primary categories and multiple subcategories uncovered during analysis.

193 Interviews at different time points and sites were analyzed separately and trends over time and  
 194 across sites were documented, capturing shifts in health and wellness, personal circumstance,  
 195 and perception of policy response. These findings are discussed together when consistent across  
 196 sites and time points, and differences are described when applicable. These categories and  
 197 subcategories are described in the following sections and include verbatim supporting quotes.

198 **Table 4.** Categories and subcategories

| <b>Categories</b>        | <b>Subcategories</b>                                                                                                                                                                                                                                                                                                                                           |
|--------------------------|----------------------------------------------------------------------------------------------------------------------------------------------------------------------------------------------------------------------------------------------------------------------------------------------------------------------------------------------------------------|
| (1) Coping with hardship | <ul style="list-style-type: none"> <li>• Experiences of loss and missed opportunities</li> <li>• Isolation, cohabitation, and interpersonal challenges</li> <li>• Disruption to education and professional development</li> <li>• Employment and financial setbacks</li> <li>• Mental and physical health decline</li> <li>• Urban vs. rural living</li> </ul> |

---

- Experiences of xenophobia

(2) Opportunities for growth

- Learning new skills and hobbies
- Slower pace of life and commitment to personal development
- Gratitude for re-opening and life prior to pandemic
- Positive experiences with remote education and employment

(3) Adapting to new ways of accessing services

- Difficulties seeking support in the midst of health service disruptions
- Getting comfortable with virtual services

(4) Mixed views on the pandemic: Attitudes, behaviour, and perception of policy response

- Adherence to guidelines
- Perception of policy response
- Absent youth voice in policymaking
- Unfair judgement of youth role in the pandemic
- Vaccination in the face of hesitation

- |                                                                   |                                                                                                                                                                                                                                                                                                                       |
|-------------------------------------------------------------------|-----------------------------------------------------------------------------------------------------------------------------------------------------------------------------------------------------------------------------------------------------------------------------------------------------------------------|
| (5) Navigating COVID-19 information                               | <ul style="list-style-type: none"><li>• Confusion around pandemic information presented by the government</li><li>• Accessing COVID-19 information through multiple forms of media</li></ul>                                                                                                                          |
| (6) Transitioning to life after the pandemic                      | <ul style="list-style-type: none"><li>• Cautious readjustment to a new normal</li><li>• Concerns for the future</li><li>• Optimism about positive social changes</li></ul>                                                                                                                                            |
| (7) Youth-led recommendations for government and service response | <ul style="list-style-type: none"><li>• Youth voice needed in decision making</li><li>• Communicating public health information effectively to youth and combatting misinformation</li><li>• Post-pandemic services: enhancing service delivery to improve outcomes</li><li>• Planning for future pandemics</li></ul> |
- 

## 199 **1. Coping with hardship**

200           Several pandemic-related hardships were identified, amounting to cumulative stress over  
201 the course of the study period. Participants detailed challenges pertaining to loss of experiences,

202 interpersonal relationships, disruption to education and professional development, financial  
203 setbacks, mental health decline, and experiences of xenophobia exacerbated by a rise in political  
204 tension.

## 205 **Experiences of loss and missed opportunities**

206 Youth reported experiencing loss of important childhood and adolescent milestones,  
207 describing missing out on their “*prime years*” (BC, T1) due to lockdowns and restrictions.  
208 Youth expressed awareness for how their generation has been impacted in unique ways due to  
209 the transitional nature of the participants’ ages, with one participant saying, “*I’ve been a lot more*  
210 *lonely ... it feels like a ton of my prime-time – my prime years are being wasted*” (BC, T1). For  
211 some, these disruptions felt like a disadvantage in terms of emotional and professional  
212 development, with one participant saying, “*It affects our generation a lot, just because ... these*  
213 *are our prime years to meet new people and gain new experiences and stuff like that. I feel like*  
214 *we have ... a disadvantage*” (BC, T1).

215 Youth were also impacted by missing out on important events to celebrate achievements  
216 such as graduation, birthdays, and other moments of significance. These missed opportunities to  
217 recognize pivotal moments of accomplishment in a public forum were realized in the early days  
218 of the pandemic: “*I didn’t have a graduation ceremony, so I didn’t get to celebrate or take*  
219 *pictures with my parents. Didn’t get to walk with my diploma or say goodbye to my friends, or do*  
220 *any form of partying or celebrating finishing school*” (BC, T1).

221 No longer able to engage in typical activities as an adolescent, youth suffered erasure of  
222 formative experiences, reporting, “*you’re never going to get the year back*” (Ireland, T2). Lost  
223 time and missed opportunities contributed to a collective sense of grief.

## 224 **Isolation, cohabitation, and interpersonal challenges**

225           Across regions, interpersonal challenges became apparent due to lockdown and  
226 restrictions on social gatherings, where connections became strained due to diminished contact:  
227 *“It is almost like a whole year of bonding is gone”* (Ireland, T1). Warmer weather acted as a  
228 buffer against isolation, since participants had more freedom to engage with others safely  
229 outside. During colder months, as case numbers rose and restrictions tightened, participants  
230 expressed increased feelings of loneliness:

231           *“The summer, at least in BC, was still pretty good in terms of being able to see people ...*  
232 *The weather being good, as well, helped. Since then, it's been tough not seeing people in*  
233 *person, and not having those kinds of social connections”* (BC, T2).

234           Different views on policy guidelines and pandemic restrictions contributed to relational  
235 disconnect. The strain on relationships was most apparent at T2 as restrictions tightened, and  
236 friends and family members had differing views on vaccinations and following guidelines:

237           *“I still feel kind of disconnected from a lot of my friends, just because of the pandemic,*  
238 *and everyone's different ways that they feel about the restrictions. A lot of my friends are,*  
239 *maybe, more open, and maybe not following the rules as much as myself”* (BC, T2).

240           Many participants expressed technology fatigue over time, where communicating in the  
241 form of texting or video chatting could not replace the in-person connection: *“That's a big part*  
242 *of it, not being able to just hug people”* (Ireland, T2). For some, maintaining virtual relationships  
243 was a daunting task, described more like a chore than an opportunity for social interaction: *“You*  
244 *kind of can only keep so many relationships going virtually”* (ON, T2). As one participant  
245 described the trials and tribulations of virtual communication:

246            *“I just have a lot of troubles with calls, maybe not calls, but texting people ... I just don’t*  
247            *think you can maintain any sort of social relationship just on social media.”* (ON, T1).

248            In contrast, too much time with family enabled conflict due to a lack of personal space,  
249            with youth noting the adverse effects on their mental health as a result. *“Family issues spiked*  
250            *up”* (Ireland, T1) during lockdown, when family members were living, working, and attending  
251            school under one roof, the effects of which were felt most among youth with challenging  
252            dynamics with their parents: *“My parents weren’t very supportive of me and I kind of had to stay*  
253            *in that house, and you know, get talked down to and belittled every single day, but also my*  
254            *anxiety from not going out really anywhere skyrocketed”* (ON, T1). Confined by the inability to  
255            seek refuge in safe relationships, feelings of isolation were compounded for youth in challenging  
256            family dynamics.

## 257            **Disruption to education and professional development**

258            Youth described how online learning was an adjustment. Difficulties associated with  
259            abrupt changes in educational formats were most apparent at T1. Youth experienced obstacles  
260            managing a self-directed learning style, feeling distracted and less productive at home. Some  
261            students with disabilities experienced challenges navigating a new way of learning without the  
262            necessary infrastructure to provide accommodations in virtual course formats:

263            *“A lot of institutions took the opportunity of digital and online services to mean that they*  
264            *no longer had to provide specific disability services, which, had they talked to students,*  
265            *would know that’s not acceptable nor equitable access ... online does not mean*  
266            *accessible”* (BC, T1).

267 Technical issues compounded by adjusting to an online format while at home posed  
268 several learning barriers:

269 *"I find it very hard it's like school online takes a huge toll on like me personally I find it*  
270 *extremely stressful to keep up with it. It's given me a couple of like breakdowns especially*  
271 *in the last couple of weeks ... it doesn't feel like you're actually in school like or in*  
272 *college. You're just in a room watching things"* (Ireland, T1).

273 For those experiencing greater mental health problems due to pandemic-related  
274 challenges, academic performance declined: *"It really affected me, and it really affected my*  
275 *mood. I couldn't do well on online school, so I really was in trouble, and then I didn't finish"*  
276 (BC, T1). Students described heightened stress, lower mood, lack of focus, an inability to  
277 complete course work, and an overall work environment not conducive to productivity.

278 Teacher-student communication issues emerged, where students needing extra assistance  
279 were unable to receive proper support virtually. Managing questions over email was not adequate  
280 for those requiring clarity and a fluid back-and-forth dialogue on an academic issue:

281 *"We used to speak with the teacher, we used to be in a classroom, you could talk to them.*  
282 *But now everything's online, and learning online is a lot harder, 'cause you can't really*  
283 *ask questions the way you could in class sitting in front of the teacher"* (ON, T1).

284 In applied programs and career paths requiring more technical training among college-  
285 and university-aged students, educational progress slowed. Without adequate hands-on  
286 experience, youth felt they were not receiving the same type of education they would have had if  
287 the pandemic had not happened. In some cases, youth worried how lacking such skills would

288 affect future career prospects, feeling “*ripped off in terms of professional development*” (BC,  
289 T2).

290 “*Starting a brand-new program, especially one that's super hands-on learning, it was*  
291 *really difficult to find times and opportunities to practice hands-on skills that I need to*  
292 *develop*” (BC, T2).

### 293 **Employment and financial setbacks**

294 Job loss or reduced “*COVID hours*” (BC, T2) led to financial stress that was particularly  
295 noted in T1. Fear surrounding being able to find a new job and afford the cost of living took a  
296 toll emotionally, adding new stress for some on relationships:

297 “*It was the end of my school term, so I had no money left, and it was definitely pretty*  
298 *scary, so I don't want to be in that situation where I was floundering, looking for money,*  
299 *and I ended up having to rely on my boyfriend a lot. Which, this is my ex-boyfriend, but it*  
300 *kind of created this weird power imbalance in our relationship, where I had to rely on*  
301 *him for everything*” (BC, T1).

302 As an age group that occupies a large portion of customer service and hospitality  
303 positions, youth expressed concern about returning to a work environment with potentially  
304 increased exposure to COVID-19: “*[Working in retail is] absolutely terrifying, to be exposed to*  
305 *that many people every day, like, you know, how many people come through to shop which is*  
306 *something that we've all been avoiding over the past couple months*” (Ireland, T1). Fear of  
307 contracting COVID-19 arose, along with challenges dealing with the public with the  
308 implementation of new public health mandates requiring masks and vaccination in certain  
309 establishments:

310           *“Since everything was opening up, the public seemed a little more lax in terms of some of*  
311           *the public health restrictions. So, you know getting into disagreements over, you know if*  
312           *they should wear a mask and stuff like that, and having to explain that the pandemic is*  
313           *still going on. It is a customer service job, so I’d get yelled at quite a lot this summer*  
314           *[2021] over that, as well as you know trying to enforce public health recommendations”*  
315           (ON, T3).

### 316   **Mental and physical health decline**

317           Mental health challenges presented in the form of disrupted sleep schedules, increased  
318           substance use and social anxiety, and decreased motivation. Youth described how prior stressors  
319           were exacerbated by pandemic-related stress, with symptoms most prevalent during lockdown  
320           periods and winter months.

321           With online school and reduced work hours or job loss, maintaining a routine became  
322           difficult, which perpetuated mental health challenges: *“I have trouble with maintaining a regular*  
323           *sleep schedule. And so that's exacerbated by not having a schedule – like during the pandemic*  
324           *there's more onus on me to schedule things and there's less outside – outside factors for me to*  
325           *rely on as a schedule”* (ON, T2). Youth described reliance on unhealthy coping mechanisms and  
326           increased substance use to mitigate mental health challenges: *“When I feel like that [out of*  
327           *control], then that’s when I start to smoke and do a lot of other things to keep myself distracted*  
328           *and mellow it out”* (ON, T1). Unable to turn to typical coping strategies such as leaning on  
329           friends, youth struggled to find ways to support their wellbeing:

330           *“It's been significantly more difficult to manage symptoms since the COVID pandemic*  
331           *has hit, and I think that's because, not being able to get out of the house and see my*

332 *friends ... socializing, getting out, and doing things, is quite important to me – keeping a*  
333 *good mental health” (BC, T1).*

334 *“My substance use has definitely gone up or it has become more frequent, like quite*  
335 *dramatically. And that’s in part because I, again, I live alone, I work from home, so*  
336 *there’s a lot more opportunity sort of for me to engage with substance use. And also*  
337 *because I’m engaging with that more and I have more time to sort of think to myself and*  
338 *ruminate on my life circumstances and my situation and stuff like that, that has also been*  
339 *challenging to my mental health in general which has also contributed to me using*  
340 *substances more and more” (ON, T2).*

341 Over time, youth described how isolation heightened social anxiety: *“You’re always on*  
342 *edge, everything seems like we’re in war or something and you have to stay inside ‘cause there’s*  
343 *curfews and danger and everything all the time” (Ireland, T2).* Living in a perpetual state of fear  
344 when interacting with others and experiencing lockdowns led to difficulties socializing: *“Being*  
345 *cooped up inside 24/7 isn’t good for anybody ... You stay inside, you’re going to develop*  
346 *different problems socially” (Ireland, T2).* Everyday tasks such as going to the grocery store or  
347 seeing friends became associated with fear:

348 *“I’m afraid of going into public places like Costco, or being in a bigger group of friends.*  
349 *If there’s ten people – even if we’re social distancing, I still feel uncomfortable if*  
350 *someone’s gone somewhere, and I know where they’ve gone, or I don’t know where*  
351 *they’ve gone even, I feel uncomfortable” (BC, T2).*

352 Motivation to learn, work, or complete typical tasks decreased while navigating life  
353 through the mundaneness of the pandemic: *“I can’t bring myself to do anything ... If I tried to do*

354 *school, I couldn't do school, even one course. I can barely take care of myself throughout the*  
355 *day. I just don't have any motivation to do anything” (ON, T3).*

356 For many, winter months intensified boredom, where shorter days and colder weather  
357 negatively impacted mental health. Youth described feeling like they were living the same day  
358 on repeat:

359 *“It definitely got worse in the winter. God, it’s much harder to do anything when it’s*  
360 *cold. I don't know, especially I think in January [2021] was terrible, like when it was*  
361 *getting dark, ugh, I hated that month. And it was kind of, there was nothing else to do but*  
362 *just wake up. I kind of started to feel like I was living the same day over and over again,*  
363 *especially in, like January, February, like I was living the same week because it would be*  
364 *like I have the exact same worries on Monday and then that's done. And then I have the*  
365 *exact same worries again and again and again and again” (Ireland, T2).*

366 In instances where youth contextualized prior difficulties with mental health problems,  
367 COVID-19 added *“this extra layer of anxiety and stress that's just been coated across everything*  
368 *... It feels like it's just blanketed the whole thing, and it's added more weight to everything” (BC,*  
369 *T1).* Youth described feeling a *“constant high state of alert and stress” (BC, T2),* with little to  
370 no relief: *“It’s just something that’s always there and I feel like it kind of accentuates whenever*  
371 *something that you do have that’s more negative on your life ... It kind of compounds with*  
372 *anything negative in your life, and so it’s very easy to kind of wear down on you” (ON, T2).*

373 In addition to negative mental health impacts of the pandemic, youth experienced  
374 physical health declines due to closure of gyms and recreation centres, colder weather making it  
375 difficult to exercise outdoors, and inaccessible physical health services, including doctors,

376 physiotherapy, and other health services: *“I loved going to the gym but I have not been to a gym*  
377 *since probably December”* (ON, T2).

378           However, improved mental and physical wellbeing were often observed in summer  
379 months, where youth had opportunities to get outside, exercise, and safely interact with peers in a  
380 physically distanced manner: *“I think summer is also a big factor, like weather. It changes*  
381 *everyone's mood. So I think it's definitely more hopeful when the summer comes. Everyone will*  
382 *be more happier and more hopeful”* (BC, T2).

### 383 **Urban vs. rural living**

384           COVID-19 experiences differed for youth depending on their community. Those in rural  
385 areas expressed gratitude for more open space to get outside and physically distance:

386           *“If I was to live in town in the city, I wouldn't be going out for a walk, because I'd be*  
387 *more likely to bump into people ... I'd be inside more, and then I'd be driven more crazy.*  
388 *I really do need those walks every now and again, and just get out of the house. And I*  
389 *don't know if I would be confident enough to do that in town”* (Ireland, T2).

390           However, misinformation and people not following guidelines was a reported concern,  
391 with one youth in a rural community reporting, *“I think in terms of the general attitude around*  
392 *COVID, it's maybe a bit more ... Uneducated, than in a city”* (BC, T2). In urban spaces, greater  
393 population density led to an increase in fear and added challenges getting around the city:

394           *“If we had enough money to afford a car, we wouldn't have to worry about catching COVID*  
395 *from public transit. Wouldn't have to get in that sardine bus. We'd be able to go and visit friends*

396 *without worrying about, like, OK, I am exposing myself to, like, hundreds of people”* (ON, T3).

## 397 **Experiences of xenophobia**

398 Asian-Canadians experienced a *“big increase in harassment and racism”* (BC, T2) noted  
399 midway through the study period. Instances of hateful rhetoric became more commonplace, and  
400 as a BC participant recalled, *“I did get some of the racist comments when I was at Costco,*  
401 *because of being Asian. I did receive a lot of comments about it, so I think those did affect me,*  
402 *and I think it's going to affect me after the pandemic, as well”* (BC, T2). Because of these  
403 experiences, as well as seeing cases of racism and xenophobia on the news, some described  
404 feeling unsafe in public settings:

405 *“I guess it's important to stay more vigilant now. (...) [S]ometimes there's those kind of*  
406 *creepy looking [people] who you don't know if they're going to start verbally harassing*  
407 *you on the subway and stuff because you're alone and there's not people around to kind*  
408 *of protect you anymore”* (ON, T3).

409 In Ireland, one participant spoke about how xenophobia is resulting in a *“divide in*  
410 *society”*, citing a mentality in Irish society of *“‘No Chinese, no Brazilians, no Brits’, because*  
411 *like they brought the new variants”* (Ireland, T2). They also spoke about their family members  
412 experiences’ *“getting abused on the bus”* and being told *“you brought COVID here”* (Ireland,  
413 T2).

## 414 **2. Opportunities for growth**

### 415 **Learning new skills and hobbies**

416 The pandemic presented an opportunity to develop new hobbies and skills. Honing a  
417 craft, indulging in creative endeavors, and exercising buffered against stressors in the early days  
418 of quarantine during T1 interviews:

419 *“During the first lockdown, I actually picked up the hobby of running, because I didn't*  
420 *have anything else to do. And I always wanted to try running, but I never really got the*  
421 *chance to”* (Ireland, T1).

422 *“I started doing baking as a hobby more during COVID. I've always liked baking, but I*  
423 *really picked it up a lot more throughout COVID”* (Ontario, T1).

424 With newfound leisure time, youth were able to put their energy towards activities that  
425 would otherwise not be prioritized, which improved mental health:

426 *“Especially during the early days of quarantine, that was pretty helpful, being able to*  
427 *create something, or lots of people got into baking. I don't know, I think little things like*  
428 *that, like being able to acquire a new skill that you didn't have before, I think that's*  
429 *important for your mental health, and just feeling like you are accomplishing something,*  
430 *even when everything else is kind of at a standstill”* (BC, T1).

### 431 **Slower pace of life and commitment to personal development**

432 Many used their newfound free time to slow down, self-reflect, and *“build better habits”*  
433 (ON, T3). The impacts of a slower pace of life were particularly apparent during T1 interviews,  
434 as some youth experienced reduced responsibilities because of changes in employment and  
435 education. This gave youth time to reflect: *“It's forced me to slow down, in a way, and to spend*  
436 *more time with myself, and learn more about myself”* (BC, T1). Others were able to recover from  
437 burnout: *“I was running at such a high level, and burning a lot of steam and not giving myself*

438 *that time to reflect on situations and myself, and COVID kind of forced me to do that, because I*  
439 *had the literal time to do it” (BC, T1).*

440 Despite hardship during the pandemic, more time alone acted as a catalyst for change: *“It*  
441 *taught me a lot about my mental health ... how to take care of myself, and how to practice self-*  
442 *care” (BC, T1). Several youth took initiative to understand themselves better and begin a journey*  
443 *of healing during this time.*

444 In some instances, youth noted an increase in help-seeking behaviour, declaring, *“If it*  
445 *wasn't for the pandemic, I think I'd still probably be suffering from mental health [problems]”*  
446 (Ireland, T3). These participants practiced self-care by confronting their mental health issues and  
447 reaching out for support instead of suppressing emotions:

448 *“The thing about being stuck in your house is that you can't escape anything. Like all of*  
449 *your issues, you have to deal with them right now because there's no going anywhere.*  
450 *Like it's just you and your head in this house so you have to, you know, deal with it ... I'm*  
451 *at a point now where I'm being forced to make life changes and I'm being forced to*  
452 *actively confront my life and my issues” (Ireland, T2).*

### 453 **Gratitude for re-opening and life prior to the pandemic**

454 Gratitude and appreciation toward returning to a “normal” life as restrictions lifted were  
455 noted across all time points: *“I think it kind of just made me appreciate everything, kind of more.*  
456 *Like even whenever I was able to see my granny for the first time, I just would be something so*  
457 *normal to me and then it was just like this whole big thing” (Ireland, T1). For some, the*  
458 pandemic served as a reminder to *“[have] gratitude for what's happening in the present cause*  
459 *you don't really know what's going to happen in the future” (ON, T1).*

## 460 **Positive experiences with remote education and employment**

461 While some youth experienced a multitude of difficulties adjusting to remote education  
462 and employment, others found they were able to excel with the shift to virtual. Positive attitudes  
463 towards remote education and employment increased in T2 and T3 as rocky transitions passed.  
464 Virtual education and employment were valued for accessibility reasons for individuals who live  
465 in rural regions and/or have certain disabilities or physical or mental health conditions that limit  
466 their ability to participate in in-person activities: *“I also have a chronic illness, which affects*  
467 *fatigue and mobility, so being able to have class online was really helpful, as well”* (BC, T1).

## 468 **3. Adapting to new ways of accessing services**

469 Physical health, mental health, and substance use services had to quickly shift from in-  
470 person to virtual care. During this transition period, youth experienced service disruptions, noted  
471 in T1 interviews. Barriers to accessing services improved with time as adaptations to online  
472 service delivery developed. However, concerns including prolonged wait times, not feeling  
473 prioritized in the mental health sector, and hesitancy to seek help persisted through all time  
474 points.

## 475 **Difficulties seeking support in the midst of health service disruptions**

476 For many, wait times were an obstacle prior to the COVID-19 pandemic, made worse by  
477 service closures during lockdowns. Such disruptions left youth with few resources to manage  
478 their mental health: *“There was no options. There was no Skype call offered to me. There was*  
479 *literally nothing. I was lucky to receive a text message at one stage”* (Ireland, T2).

480 With nowhere to turn, several youth noticed a decline in health:

481            *“For myself, though ... Maybe some worsened health, just because appointments have*  
482            *taken so long to get to, and I haven't been able to see in-person doctors” (BC, T1).*

### 483    **Getting comfortable with virtual services**

484            Once virtual services were implemented, some youth expressed preference for in-person  
485    support, though many acknowledged benefits of virtual appointments. One was using virtual  
486    services for general health concerns and prescription refills:

487            *“It's been working well, for me. Most of the time, it's just for a prescription refill or an*  
488            *update on how my health has been, so it's pretty convenient to just call and expect a*  
489            *phone call, like I can be at home, and I don't have to go anywhere and wait for too*  
490            *long” (BC, T1).*

491            Another benefit was that many participants felt more comfortable accessing virtual  
492    supports than in-person supports due to the online disinhibition effect:

493            *“When I was doing it face to face I would shy away from a lot of conversations because*  
494            *I'd feel embarrassed or I'd get distracted. Where now on a Zoom call it just kind of feels*  
495            *like a normal phone call. Ahm, so I'd kind of be able to tell a lot more because I can't*  
496            *find myself distracted because all I can see is obviously my screen” (Ireland, T1).*

497            By T3, the convenience and accessibility aspects of virtual services were acknowledged  
498    as something that should be continued: *“I think online services can be great, more accessibility*  
499    *for people in remote locations. Jobs that don't conform to like business hours for therapists ... I*  
500    *think it's better than only in person, because in person is just not accessible” (BC, T3).*

501 On the other hand, some participants had ongoing negative experiences with virtual  
502 services. The effects of their day-to-day life being virtual began to take a toll: *“I’m so fatigued*  
503 *from all the virtual stuff that it would just drive me crazy if I tried to use virtual services for*  
504 *mental health”* (ON, T3).

505 Technology problems created fractures in the flow of appointments, negatively impacting  
506 the overall quality and experience of services:

507 *“When the network is cut off or the internet’s lagging or you’re having a hard time*  
508 *hearing the other person, that interrupts the intervention. That interrupts the mindfulness*  
509 *practice that you were just in the middle of and kind of taints the experience”* (ON, T3).

510 Disrupted continuity impacted client satisfaction, reducing desire to access services in  
511 this way. Participants described virtual counselling as *“totally disconnected”* (BC, T1). Lack of a  
512 personal connection to establish a rapport contributed to hesitation attending more intimate  
513 appointments over phone or video: *“I feel discouraged to go up to these online sessions. It still*  
514 *feels like you’re talking to the computer. It’s not the same”* (Ireland, T1).

515 For youth living with family or roommates, they felt the lack of privacy led them to be  
516 hesitant to access virtual services and inhibited from maximizing their therapeutic experience:

517 *“I wasn’t sure about [virtual services]... if I was able to do that in the home, because as I*  
518 *said before, like, everybody’s at home. It’s hard to find a space where it’s quiet and*  
519 *nobody can hear you. A space where you can really be vulnerable with the person that*  
520 *you’re talking to and trust that it’s only them that can hear the information and all*  
521 *that”* (Ontario, T1).

522 With regards to synchronous chat, the depersonalization aspect of texting was a concern  
523 due to inability to convey the full range of expression during diagnostic procedures: *“A lot of*  
524 *emotions and undertones aren’t really gotten across with text ... from a diagnostic perspective,*  
525 *it’s probably not the best because people can really fake things via text, like, you could lie your*  
526 *way out of anything on text message, and nobody would know”* (ON, T1). For others,  
527 synchronous chat provided an alternative option when coping with anxiety due to flexibility of  
528 communicating in times of need without a scheduled appointment and no pressure: *“It’s not*  
529 *invasive or anything, and you can say as much as you want or stop replying when you*  
530 *want”* (Ireland, T1).

#### 531 **4. Mixed views on the pandemic: Attitudes, behaviour, and** 532 **perception of policy response**

##### 533 **Adherence to guidelines**

534 Notable observations were made regarding how youth and other generations reacted to  
535 the pandemic. Fear of the unknown meant a greater willingness to follow public health  
536 guidelines such as physical distancing, wearing a mask, and frequently using hand sanitizer in  
537 the early days of the pandemic:

538 *“I think initially everyone was [taking it seriously], young and old, were petrified, when*  
539 *we didn’t know. I think fear of the unknown at the start was why the first lockdown*  
540 *worked so well. Because everyone was really adhering, because like, no one knew how it*  
541 *[COVID-19] was going to affect you, you’d see the awful things on the TV and you didn’t*  
542 *know that sometimes you could literally have nothing [no symptoms]”* (Ireland, T1).

543 Others expressed willingness to adhere to public health guidelines in service of collective  
544 responsibility: *“I think that their role, like our role, everybody’s role is to try and stop the*  
545 *spread. So everybody has a responsibility to limit their contact”* (Ireland, T1).

546 Several youth expressed discontent regarding others not taking guidelines seriously,  
547 impacting how youth perceived the longevity of the pandemic: *“I also do see people around me*  
548 *that are not taking the pandemic very seriously ... I just have frustrations with the current*  
549 *situation that make me not very optimistic about it”* (BC, T1). Social media became a space  
550 where youth could check in on what their peers were doing, influencing feelings of hope during  
551 this time: *“I see a lot of Instagram posts, social media posts where people are all together*  
552 *without a mask on, without anything, large group of people. That definitely brings down the hope*  
553 *a little bit ... Situations like that can really set back the progress that’s been made”* (ON, T1).

554 Youth perceived their peer groups as adhering to guidelines more than older generations  
555 in terms of physical distancing: *“I feel like it’s usually the middle-aged people who are more not*  
556 *following the policies and rules of outdoor places, or even restaurants and whatnot. I think that*  
557 *for the most part, youth are being pretty respectful of that”* (BC, T1). Potential reasons for this  
558 difference were explored:

559 *“I think that teenagers as a whole have actually handled it very, very well. Because we’re*  
560 *so young, we’re like a sponge. We soak things up. We’re still being taught things. We’re*  
561 *still being told how to do things, as where, somebody in their 30s are kind of set in their*  
562 *ways”* (Ireland, T1).

563 Over time, youth expressed less regard for following public health guidelines: *“The*  
564 *fedupness has taken over the wanting to be safe”* (Ireland, T3). Participants discussed growing

565 tired of repeated lockdowns and constantly changing guidelines: *“Pandemic fatigue has people*  
566 *saying ‘Well whatever, it hasn't touched me, yet. Why would it touch me, now?’ And I feel like*  
567 *people are kind of over all the rules and regulations”* (BC, T2). As people became accustomed  
568 to a new way of living in the midst of the COVID-19 pandemic, there was a reduced sense of  
569 urgency to follow restrictions:

570 *“I think, in the beginning we all saw how serious it was and we all kind of knew it was*  
571 *our, not job, but aim, to keep other people safe, so that's why we were sticking to all the*  
572 *guidelines and we were doing what we were told and things like that. But in the past*  
573 *three months, being stuck at home, back lockdown again, school. I've seen a lot of people,*  
574 *and it shocked me, that have just completely given up on it, and just don't want to do it*  
575 *anymore ... I think they've kind of given up hope a little bit”* (Ireland, T2).

576 In this sense, youth described this change in behaviour as not a result of lack of caring,  
577 but rather a progression of the impact of the pandemic on lifestyle change and mental health.  
578 This increasing toll contributed to a sense of indifference towards following rules. Despite the  
579 disillusionment with policy guidelines, increased anxiety about getting COVID-19 was also  
580 noted over time:

581 *“I think I'm more actively worried than I was previously. Before, I just kind of took my*  
582 *precautions – I did my best to stay out and that kind of thing. But now, I find myself*  
583 *getting stressed out at the grocery store when people are too near me. And I find myself*  
584 *actively avoiding certain situations, even more so than I did before ... So it's just – I feel*  
585 *a lot more anxious, right now, when I'm out in public”* (BC, T2).

586           Such concerns were worsened by the rise of new strains of COVID-19, reigniting fear of  
587   uncertainty of the severity of the disease and risk of a greater spread: *“Everyone now is talking*  
588 *about the Delta variant and it’s just so mentally draining”* (ON, T3). These fears led to  
589   participants experiencing a greater sense of hopelessness due to concern that the current  
590   resources to combat COVID-19 would not be effective long-term:

591           *“Just hearing that it is more deadly and more contagious, is definitely a worry. Because I*  
592 *know before people were thinking, well, you know, there are the vaccines coming out, so*  
593 *once I get it I’ll be fine. But you know, the findings that maybe it doesn’t work completely*  
594 *against the variants, that kind of makes it seem like there is no solution in place”* (ON,  
595   T2).

## 596   **Perception of policy response**

597           Participants had mixed reactions to government policy response in all three regions. In  
598   Canada, the Canada Emergency Response Benefit (CERB) program, which provided financial  
599   support to Canadians whose employment income was affected by COVID-19, was viewed  
600   overwhelmingly as having a positive impact by alleviating financial strain. For students in  
601   college and university, having the financial support allowed youth to focus on their education  
602   and limit additional stressors:

603           *“I think the government definitely did help, especially with CERB cheques and things like*  
604 *that ... having the government step in and financially assist me during this time was*  
605 *hugely beneficial, and allowing me to continue with my education, and not be stressed*  
606 *about money”* (BC, T1).

607 On the other hand, some participants in Ireland felt the COVID-19 Pandemic  
608 Unemployment Payments (PUP) were a source of stress, with some young person worrying “*that*  
609 *they’re going to make everyone pay back for COVID pay in tax*” (Ireland T3). Others felt  
610 frustrated by “*COVID pay*” (Ireland T3), causing tensions between those who received it and  
611 those who did not: “*My friend signed on to the COVID pandemic payment ... I stopped talking to*  
612 *her for about four days, I was like ... ‘I have to do 20 hours in three days. I am exhausted and*  
613 *you’re rubbing it in my face*” (Ireland, T2).

614 While youth expressed contentment with restrictions implemented to keep people safe, a  
615 number of concerns were also raised. Over time, dissatisfaction centred around issues of  
616 changing guidelines and continuous lockdowns put in place by each region’s government: “*I*  
617 *think the way they’re going about it, as in a little-by-little, and then they open it a little bit and*  
618 *then they go back again, think that’s doing a lot of damage to people’s mental health*” (ON, T2).

### 619 **Absent youth voice in policymaking**

620 A growing concern raised across sites and timeframes was a consistent lack of youth  
621 voice. Youth did not see themselves reflected in policy or feel they had an impact to steer  
622 outcomes, though they noted the importance of their voice for realising change for the youth  
623 population. In terms of policy decisions, youth expressed discontent with “*no youth at that*  
624 *table*” (BC, T1) and felt “*brushed to the side*” (Ireland, T3), describing, “*I feel like we have no*  
625 *say and we’re just following what other people are telling us to do*” (ON, T2). Lack of attention  
626 to youth issues contributed to a sense of invisibility: “*It’s like we don’t exist*” (Ireland, T2).

627 Despite desire to be involved in government and decision-making processes, youth noted  
628 minimal opportunity to engage: “*To a person who is young, them being able to put their voices*

629 *out, that ability is very much hampered down, just because of these systemic barriers that are*  
630 *happening, and forces that work against young people”* (BC, T1). The absence of youth  
631 participation was most apparent concerning decisions around education. Many felt dissatisfied  
632 with schools closing and re-opening:

633 *“Being a student is unique, because I feel like most students were placed in a position*  
634 *where they didn’t really have a lot of power and we felt really passive in how we were*  
635 *receiving information and how decisions were being made in terms of our education”*  
636 (ON, T3).

637 As the last group to get the vaccine, youth raised concerns about returning to school: *“My*  
638 *university has mentioned that we would be opening up in September [2021] despite the fact*  
639 *basically no one would be up for vaccination until October at the earliest. I feel like that’s*  
640 *something someone could have pointed out”* (ON, T2). Lack of choice regarding decisions to  
641 continue school virtually or in-person created strife among university-aged students: *“Going*  
642 *back to campus full time without any online options, I don’t think that a young person would*  
643 *necessarily make that decision”* (BC, T3). Frustration continued to grow over time as the  
644 perception of neglect persisted: *“There’s been such a lack of concern for university age people,*  
645 *you know? That I think people are getting a bit disgruntled”* (Ireland, T3).

646 Youth recognized the value in having their opinion shared despite being young: *“Just*  
647 *because you’re 20 doesn’t mean your experience is worth less”* (BC, T3). Desire for involvement  
648 stemmed from an understanding of being future decision makers: *“We’ll be the next people in-*  
649 *charge of things. Every generation can build on the last generation ... I think that’s what makes*  
650 *young people in the world so important, because we can all learn from people’s past mistakes*

651 *and build on that and stuff*” (Ireland, T2). With this mindset, youth described the importance of  
652 engaging in activism and online petitions and voting when of age in order to effect change.

### 653 **Unfair judgement of youth role in the pandemic**

654 A recurring sentiment among participants was the perception that youth were being  
655 disproportionately blamed for the spread of infection in the media. Youth described feeling  
656 *“unfairly targeted”* (BC, T1) upon experiencing criticism for breaking rules and not taking the  
657 pandemic seriously:

658 *“We’ve all been labelled like this, you know, ‘it’s the young spreading the virus’, ‘it’s the*  
659 *young that don’t care’, but it’s not like that, that’s not true, like I’m taking all this very*  
660 *serious. It’s affected my life in ways that I could never have even imagined”* (Ireland,  
661 T1).

662 In light of these accusations, youth countered such blame by pointing out how they are  
663 vulnerable to infection as the last age group to be eligible for the vaccine, as well as a  
664 demographic notably on the front lines of customer service and hospitality jobs, placing them at  
665 increased risk compared to those with the option to work from home:

666 *“... [Young people] are sort of being blamed for a lot of the spread, but also, that age*  
667 *category is probably a lot of the people who’re working minimum-wage, front-line jobs,*  
668 *being forced to be out in places, taking public transit, living with roommates ... And we’re*  
669 *going to be the last to be vaccinated which is, again, frustrating”* (ON, T2).

### 670 **Vaccination in the face of hesitation**

671 Overall, youth expressed willingness to get a COVID-19 vaccine. For those with  
672 concerns, hesitancy was raised surrounding uncertainty about the speed at which the vaccines  
673 were developed and rolled out in addition to not knowing the long-term impacts. Such concerns  
674 were most commonly raised at T1, prior to vaccines becoming available: *“I’m not anti-vaccine,  
675 but I feel like they are rushed ... You never know what the side effects are in a year or ten years  
676 from that vaccine, right? That’s something that I worry about”* (BC, T1). Some youth felt like the  
677 misinformation online contributed to their uncertainty about the vaccine:

678 *“I have mixed feelings about [the vaccine] ... I feel like I feed in to Facebook been like,  
679 oh, it will make you have a brain damage ... don't take it, [you'll] never have children  
680 and stuff like that. But I feel like if it was that bad, they wouldn't be giving it to people.  
681 So, I just look at actual scientific side of it rather than feed into random people on  
682 Facebook”* (Ireland, T2).

683 To address these concerns, youth described needing more information, presented in a way that  
684 explains how the vaccine works:

685 *“I want to know information and I want to learn about it. I wouldn't let anyone put any  
686 vaccine into me without knowing about it. So, I think what has really worried me is that  
687 the information and the responses have been so, so vague to a point where it seems really  
688 shady”* (ON, T2).

689 Despite hesitation, youth discussed several motivating factors that led them to get a  
690 COVID-19 vaccine, primarily for functional reasons and as a means to return to normalcy by T2  
691 and T3. Youth noted how a vaccine would provide a sense of safety: *“I am at ease that*

692 *something is protecting me*” (ON, T3). More than just in a practical sense, vaccines gave  
693 participants a renewed sense of optimism:

694 *“What is exciting about the vaccine is the potential to dream about the future again in a*  
695 *meaningful capacity. In a way, COVID took away the ability to conceive of any future*  
696 *because the future became indistinct, right. But having the vaccine allows you to go back*  
697 *to imagining a future that is with other people which is important”* (ON, T2).

698

## 699 **5. Navigating COVID-19 information**

### 700 **Confusion around pandemic information presented by the government**

701 Youth found pandemic information confusing and containing too much jargon: *“It was*  
702 *not easy to understand. Just a lot of big words and government words”* (BC, T1). As a result of  
703 inaccessible language, youth were deterred from seeking out information: *“I don’t listen to it*  
704 *anymore because it’s too confusing, it’s too much information being thrown out in 5-minute*  
705 *speeches”* (Ireland, T1). Over time, as guidelines changed, participants felt it was hard to follow  
706 and keep up to date with current guidelines: *“I think maybe the government could’ve done a bit*  
707 *better of mitigating some of that ambiguity and uncertainty, and helping people cope with the*  
708 *ever-changing guidelines and protocols”* (BC, T1). The need for youth-friendly information was  
709 addressed:

710 *“I feel like they should have like some younger people on the government’s team just to*  
711 *like explain what some things mean to the younger generations ... me and some of my*

712 *friends have read some stuff from the government website, and we're just like, 'what does*  
713 *even half of this mean?'" (ON, T1).*

## 714 **Accessing COVID-19 information through multiple forms of media**

715 The primary sources where youth accessed pandemic information were the government  
716 and news media's social media, webpages, and daily addresses. Having options tailored to the  
717 needs of the individual was beneficial:

718 *"I really like the Prime Minister's address ...-because I have dyslexia, I don't really like*  
719 *reading, I don't like going through long articles. I need to just hear it ... So, I just*  
720 *appreciated someone putting everything into a concise press conference so I don't have*  
721 *to go hunting for all the articles, hunting for the information and everything" (ON, T1).*

722 Social media was commonly discussed, as participants described using various platforms  
723 such as verified news outlets and government run Instagram, TikTok, Twitter, Reddit, and  
724 YouTube to access information from people or organizations whom they trust:

725 *"I think the government actually did a decent job of putting things on Instagram. I wasn't*  
726 *really active on any other platform, but just seeing like, you know, the infographics*  
727 *about, here's what you're allowed to do" (BC, T3).*

728 Youth were astutely aware of the need to find reliable sources and wade through  
729 misinformation, citing the spread of false information as a barrier to staying informed:

730 *"It's very hard to avoid any kind of misinformation or just complete lies about it. That's*  
731 *kind of a difficult thing, and I'd say that's where a lot of difficulty in miscommunication*

732 *comes from is just because people's primary new source is the internet, which is not*  
733 *always very reliable” (Ireland, T3).*

## 734 **6. Transitioning to life after the pandemic**

### 735 **Cautious readjustment to a new normal**

736 Young people anticipated challenges with re-adjusting to life after the pandemic with  
737 years of diminished social interaction and physical distancing, particularly felt in the midst of  
738 lockdowns: *“Everyone's afraid of each other”* (Ireland, T2). Participants described a persistent  
739 cautious outlook when attending public events or gatherings, with one participant saying, *“I*  
740 *think immediately after the pandemic, there's going to be a lot of people who are a little skittish*  
741 *about re-integration into crowds and restaurants”* (ON, T2). Such challenges with reintegration  
742 were recognized *“as almost a trauma response, where if someone gets too close to you, you feel*  
743 *unsafe”* (BC, T1).

744 Some participants grew comfortable with spending time alone, with long-lasting impacts  
745 on their desire for socialization: *“I've gotten used to my own company and I'm starting to enjoy*  
746 *just being with myself but that's also a negative”* (Ireland, T2). Participants recognized the  
747 importance of social interaction, though felt as though transitioning from spending time alone to  
748 engaging with others in person might be challenging: *“I feel like it's going to be hard to go back*  
749 *to real life, because I'm so used to not leaving my house, now, and I'm kind of like a bear in*  
750 *hibernation, now. I don't know if that's going to be an easy transition”* (BC, T1). Balancing the  
751 needs for social interaction with the comfort of spending time alone was thought to be a difficult  
752 balance to navigate, with concerns for long-term mental health impacts. Participants recognized  
753 these challenges as collective trauma: *“Some people will be traumatized by it and may never*

754 *heal from it*” (ON, T2). Without adequate supports in place, youth feared for their ability to heal  
755 moving forward.

## 756 **Concerns for the future**

757 When considering their futures in a post-pandemic world, participants expressed concern  
758 for the state of the economy as well as their own job prospects: *“I think economically Ireland will*  
759 *have a long time recovering and especially for when I’m older and I’m buying a house. I feel like*  
760 *the prices will still be really high”* (Ireland, T1). In light of these concerns, several youth noted  
761 that they re-evaluated their plans and goals for the future to adjust to a new world and changes to  
762 their own self, considering, *“What is post-COVID for me now, because I am in a much different*  
763 *place than I thought I would be”* (ON, T3). In light of these fears, youth described the need for  
764 support, though had concerns that their needs would not be met, particularly for those without a  
765 strong social support network:

766 *“I do think [young people] face unique circumstances and I think because of a lot of*  
767 *income inequality, like the general expectations for new graduates, I think young people*  
768 *have a lot of challenges that have been exacerbated by the pandemic, and I feel like if*  
769 *there aren’t the correct social safety nets in place. It can leave a lot of young people*  
770 *behind ... You know, not everyone has a family that they can rely upon during these sorts*  
771 *of times, and I think we just have to make sure that we’re looking out for everyone”* (BC,  
772 T1).

## 773 **Optimism about positive social changes**

774 Despite hardships endured during the pandemic, youth were able to identify silver linings  
775 and potentially positive long-term changes in terms of the workplace, education, hygienic

776 practices, and social justice. Youth hoped to see flexibility regarding work-from-home policies,  
777 *“where workplaces are more lenient, [and] people understand things like childcare”* (BC, T1),  
778 with improved accommodations for employee needs: *“I think more people are going to be*  
779 *opting to work from home if they’re allowed to because commuting to work doesn’t really do*  
780 *much for them”* (ON, T2).

781 Youth were optimistic about improved health beyond the pandemic. Continued hygienic  
782 practices to prevent spread of illness beyond COVID-19 were discussed in a positive light:  
783 *“Sanitizing, washing our hands, wearing masks when we’re sick, taking time off to stay at home*  
784 *when we’re sick, I feel like those are going to have long-term affects within the workplace, and*  
785 *within school”* (BC, T2). While exacerbated mental health challenges were noted as a continued  
786 uphill battle to address, the pandemic sparked more conversation around mental health, trauma,  
787 and help-seeking that resulted in de-stigmatization, which was thought to be a step in the right  
788 direction:

789 *“[The pandemic] really highlighted the impact that social and global events can have on*  
790 *someone’s mental health, and so I feel like I saw a lot of people kind of advocating, either*  
791 *trying to point out programs or places that people could get help”* (ON, T3).

792 *“I hope in the recovery of Ireland and the economy of Ireland and stuff, they don’t forget*  
793 *about mental health because it was such an important thing during COVID and I hope*  
794 *that’s, that slowly doesn’t fade away”* (Ireland, T1).

795 Because of the political discourse throughout the pandemic with attention to social justice  
796 issues, youth were optimistic that some of the structural inequities brought to light would be  
797 addressed in society: *“I think that will be the big frontier, because I think the pandemic, for all*

798 *the bad, does provide an opportunity to rectify some of the inequalities we've seen exposed*  
799 *through it"* (BC, T1). Inherently tied to these changes was a developed sense of compassion and  
800 empathy among youth and others, and the belief that change is possible:

801 *"I'm hoping this period helps develop empathy and kindness in people ... I'm hoping that*  
802 *this is an opportunity for people to kind of reflect on the skills that they offer in that sense*  
803 *and hopefully grow in that sense, and using those newfound skills and newfound parts of*  
804 *themselves to engage with their communities and to take care of their communities,*  
805 *whether that's physically or by leading it on a kind of social change front or whatever*  
806 *that may look like"* (ON, T1).

807 In this sense, youth expressed actionable strategies to use their voice through social  
808 media and partaking in social justice movements to pressure policymakers: *"We deserve health*  
809 *and equity, and we have the resources and the capability to have those things, we just need to*  
810 *make it happen"* (ON, T3). Participants found hope in this belief, with the change starting within  
811 themselves: *"I know me, for one, I've come out of it a better person"* (Ireland, T2).

## 812 **7. Youth-led recommendations for government and service response**

813 Four subcategories about key recommendations for government and service response  
814 were generated from the data, which related to strategies for amplifying youth voice,  
815 communicating public health information effectively to youth and combatting misinformation,  
816 optimizing services post-pandemic, and planning for future pandemics.

### 817 **Youth voice needed in decision making**

818 Participants raised the importance of incorporating youth voices in policy decisions,  
819 particularly when directly impacted by the outcome. Youth articulated the need for their voices  
820 to shine through research so that policymakers understand their needs, with attention to questions  
821 such as, *“How are you living your life? What are your priorities? What are your concerns?”*  
822 (ON, T3). School was recognized as the best way to reach a broad spectrum of youth: *“I feel like*  
823 *the only way you could really collect information from a bunch of young people is through*  
824 *school”* (ON, T3).

825 In addition to research, youth expressed desire for more opportunities for leadership to  
826 develop skills in advocacy and bridge the gap between youth and those in charge. Adults in  
827 positions of power have an important role in creating such opportunities, where leaders *“who*  
828 *have paved the way for other youth to use their voice [are] really important”* (BC, T1).  
829 Opportunities at school for youth to address issues were discussed: *“I feel like there could be*  
830 *maybe like a group of students and young people who can kind of just voice the opinions of*  
831 *everyone on their behalf and stuff and maybe just offer up suggestions”* (Ireland, T1). On a  
832 grander scale, the implementation of a youth advocate role in government was mentioned to  
833 communicate needs *“instead of someone just kind of guessing for young people”* (Ireland, T1).

834 The importance of diversity in youth experiences was recognized, with understanding  
835 that historically, persistently, or systemically marginalized youth with important stories to share  
836 may be ostracized from participation in research and decision making:

837 *“I feel like there are definitely people who should be involved but the people who should*  
838 *be involved are not usually the people who can be involved. Like if you are poor and in*  
839 *an immigrant household you are probably at home taking care of you siblings and have*  
840 *no time to sit on committee meetings”* (ON, T2).

841 **Communicating public health information effectively to youth and combatting**  
842 **misinformation**

843 Youth discussed the need to continue to “*use social media in a way that you promote*  
844 *responsible information or reliable information*” (ON, T3) because “*that's where a lot of young*  
845 *people spend a lot of their time*” (BC, T3). Concise, digestible content in the form of  
846 infographics was said to be an effective way to disseminate information, promote services, and  
847 encourage service uptake: “*None of the BS, you know ... cut all the medical jargon out ... explain*  
848 *it simply*” (Ireland, T1).

849 With regard to sharing COVID-19 information, youth thought it “*would be helpful if*  
850 *there was more clarity as to why each restriction was put in place*” (Ireland, T1) to combat  
851 frustrations with fluctuating and sometimes contradictory restrictions and to improve adherence  
852 to guidelines.

853 “I think it would be helpful if there was more kind of like clarity as to why each  
854 restriction is put in place, because people would be like ‘Hang on. So we can’t do this, but  
855 people can like, come into the country and leave the country.’ And like ‘We can do this at  
856 school, but we can't do this in shops’. And they'll be like, why is that? And they kind of get  
857 frustrated and be like, I'm not listening to them anymore. So I think it would be helpful if there is  
858 more thorough explanations as to why, like maybe you can do this, but not that, and stuff.” [e]

859 Aiming information at parents is another way to spark dialogue between parents and their  
860 children about mental health: “*I think by targeting adults, that would help the situation for*  
861 *younger people to feel more comfortable talking about their issues*” (BC, T3).

862           Aside from social media, school was reiterated as a means to convey information to  
863 youth, teach emotional literacy, and provide resources: *“I think getting information to students  
864 through institutions, I think it’s a very smart move. Like keeping up with your school’s  
865 newsletter”* (ON, T3).

866           Creating visibility surrounding resources and mental health can promote help-seeking, as  
867 recognized by a university student in BC: *“I feel like sometimes it’s like you have to go out and  
868 seek it, but it’d be nice if universities sent out emails midway through the semester, just to tell  
869 people about that”* (BC, T2).

870           A key issue raised by youth regarding accessibility of virtual information was the  
871 prevalence of misinformation and knowing how to identify reliable sources. As a generation who  
872 grew up with social media, the need for strategies to address these issues was apparent. Youth  
873 expressed desire to learn about internet literacy and critical thinking skills in the classroom:

874           *“I think internet literacy, where if people grow up and they learn, OK, not everything on  
875 the internet is true ... If that thought process was taught in school, then it wouldn’t really  
876 be as big a problem as it is today”* (ON, T2).

877           Similarly, accountability within the platforms themselves and in government was  
878 suggested as a welcomed solution:

879           *“I think holding the people accountable that spread misinformation will help and there  
880 being less bots or problematic ideas going ... tech companies holding people  
881 accountable, or governments holding people accountable”* (ON, T3).

882            *“There's a lot of false information that spreads very quickly and there definitely needs to*  
883            *a little bit more concern on the platforms part to ensure that stuff like that does not*  
884            *happen”* (ON, T3).

## 885    **Post-pandemic services: enhancing service delivery to improve outcomes**

886            An issue brought to light during the pandemic was the lack of affordable and accessible  
887    mental health services, worsened by intensifying mental health problems experienced during this  
888    time. For youth, the pandemic presented an opportunity to address some of the issues faced  
889    within the system that impact youth specifically. Despite a desire to seek help, lack of affordable  
890    and timely services created a major barrier to care:

891            *“A lot of people want mental health services and either they can't afford it or they're on*  
892            *like a six-month, one-year waiting list”* (ON, T3).

893    To address this issue, youth recommended expanding social safety nets to cater to the needs of  
894    this population:

895            *“Starting with the expansion of disability benefits, making it so that people who are on*  
896            *disability are not living in poverty, that would be a good start, because we are going to*  
897            *have a fall out in terms of the people who have been affected by COVID”* (ON, T3).

898            In the aftermath of COVID-19, there was an expressed desire for priority to be given to  
899    mental health services to counterbalance the mental health challenges that were worsened by  
900    increased stress and decreased access to services:

901            *“The government's definitely going to have to implement some sort of strategy, like for*  
902            *aftercare, I feel. I just feel like it's going to be a domino effect and it's going to go on for*

903            *years to come ... You just don't know what kind of effect that would have on somebody"*  
904            (Ireland, T2).

905            Post-pandemic services should also continue to offer virtual care according to  
906 participants. While many youth declared a preference for in-person services, there was  
907 recognition of the value in having options:

908            *"[Services should] still be definitely available online, especially because some people,*  
909            *you know, maybe aren't comfortable [with] the face-to-face environment yet, or maybe*  
910            *are immunocompromised or just physically can't get there"* (BC, T3).

## 911 **Planning for future pandemics**

912            In a future pandemic, youth emphasized that personalizing messaging to all  
913 demographics is important. In the youth context, this can be seen as communicating information  
914 regarding an infectious disease in a way that is easy to understand, digestible, and does not instill  
915 fear:

916            *"I really like simplicity, like getting to the point. Easy facts. Anything factual information*  
917            *that has key points and bolded and have diagrams, pictures, or even, like, an example,*  
918            *analogies, et cetera, would be really important to understand"* (BC, T1).

919            Ensuring resources and funding are available would help youth feel supported in times of  
920 crisis. Not all youth have strong familial relationships to provide safety and protection, requiring  
921 implementation of safety nets:

922            *"Far too often, the young-person demographic, so like not a minor, but not a middle-*  
923            *aged person, is often ignored in planning stages. It's assumed that we can operate as*

924 *those people have, but I think we have a much less robust support system, and even just*  
925 *crisis funds and things like that. I think that needs to be accounted for” (ON, T2).*

926 In light of these recommendations, it is evident that the pandemic is not simply an acute  
927 public health crisis but rather a historical event that will have lasting impacts on youth health and  
928 wellness. COVID-19 exposed gaps in service delivery for this population, where ongoing needs  
929 remain to be comprehensively addressed.

## 930 **Discussion**

931 This study explored youth experiences during COVID-19 over time and offered youth-  
932 derived recommendations for government and service responses to pandemics and other public  
933 health emergencies. Our longitudinal qualitative findings yielded key trends indicating the ways  
934 in which COVID-19 impacted participants at multiple time points over the evolving pandemic,  
935 with consistent findings across regions (BC, Canada; Ontario, Canada; Ireland). Youth described  
936 their experiences of coping with the many hardships of the pandemic and adapting to new ways  
937 of accessing services, but they also identified areas for personal growth through the hardship.  
938 Their views and attitudes about the pandemic were mixed, and they found it challenging to  
939 navigate the complex information provided about the pandemic. Challenges also arose with  
940 transitioning to a post-pandemic life. Youth leveraged their experiences to provide  
941 recommendations for responses by governments and service-providing organizations for future  
942 pandemics and public health emergencies.

943 Findings were consistent at each time point, despite some differences in the cohorts  
944 across the three sites. This may be due to the similar COVID-19 responses in these regions,  
945 including lockdown measures, vaccination rollout, testing, and contact tracing [41]. Their

946 adaptive responses all included a series of lockdowns comprising of stay-at-home orders, school  
947 and non-essential business closures, a vaccination strategy that prioritized vulnerable populations  
948 and essential workers, mandatory use of face coverings, and providing income support to  
949 affected workers [41]. Furthermore, ON, BC, and Ireland have integrated youth services that  
950 provided virtual mental health services to youth throughout the pandemic [30,35,42]. While  
951 Ireland to date has more confirmed COVID-19 cases per capita than ON and BC, this did not  
952 seem to influence the impacts on youth [43]. These findings align with observations in similar  
953 populations in other high-income countries with integrated youth services [41]. Nevertheless, it  
954 is crucial to acknowledge that further research on the impacts of the COVID-19 pandemic on  
955 youth in areas with lower income, a varied COVID-19 response, and/or without integrated youth  
956 services would be beneficial to assess the applicability of these findings across wider regions.

957         The challenges experienced in response to the COVID-19 pandemic were numerous and  
958 reflect the emerging literature. For example, the loss of key experiences has been identified as a  
959 factor affecting young people in important ways during the pandemic [44,45]. Educational  
960 challenges presented in the form of difficulties adjusting to online learning [24,46–48]. Job loss  
961 and financial strain contributed to stress over time due to sudden economic instability and future  
962 uncertainty [49,50]. Essential workers struggled with a return to risky work environments, facing  
963 the stress of contracting COVID-19 as well as managing new roles and responsibilities for  
964 enforcing public health guidelines [51]. An additional hardship noted was the increased  
965 prevalence of racism and xenophobia. Anti-Asian attitudes in the age of COVID-19 have been  
966 documented in the American context [52–54], noting higher rates of harassment and health  
967 disparities throughout the pandemic due to harmful rhetoric regarding COVID-19 origins.  
968 Difficult-to-follow public health information was an additional challenge, as was initial vaccine

969 hesitancy [55–60], although attitudes shifted toward favouring vaccines with time. With the  
970 myriad of challenges came a decline in mental health and mixed effects on substance use  
971 behaviors, particularly noted in T1 and T2, as is documented in the literature cross sectionally  
972 and longitudinally [16–20,29,61–63].

973         With the complex changes in contexts, environments, and lifestyle, youth also  
974 experienced disruptions in health service accessibility, including mental health service access.  
975 These disruptions may have further constituted a barrier to health and wellness [31,64], although  
976 acceptance of virtual services seemed to increase with time. Isolation, financial strain, and  
977 setbacks in educational and professional development in the context of reduced service  
978 accessibility may be contextual factors that led to the short-term impacts on mental health; this  
979 trajectory could also extend into long-term impacts on mental health and substance use, which is  
980 an important area for ongoing research as the pandemic resolves [65].

981         Despite the hardships experienced, youth also identified several strengths and  
982 opportunities for growth during the COVID-19 pandemic. Youth described picking up new skills  
983 and hobbies such as cooking, exercise, and creative endeavors, which helped with overall  
984 wellness. In some cases, mental health improved due to reduced demands on time and increased  
985 time to self-reflect, slow down, and recover from burnout. In this sense, the pandemic was a  
986 catalyst for change where help-seeking and engagement in services were realized for the first  
987 time. Access to green spaces was a positive factor; indeed, this has been shown to reduce  
988 symptoms of depression, anxiety, and stress [66–68]. A small body of research discusses the  
989 positive developmental opportunities, strengths, and effective coping strategies leveraged by  
990 youth during the changes in the pandemic [8,69]. Another body of research outlines post-  
991 traumatic growth in various populations during this time [69,70]. Together, these findings can

992 serve to identify strengths, protective factors, and resiliencies that can be harnessed to support  
993 mental health and wellbeing during challenging periods in history, from a pragmatic and  
994 strengths-based lens. Indeed, youth remained optimistic about the potential for the pandemic to  
995 act as a catalyst for positive social change.

996 Youth noted a lack of attention to youth needs, consideration of unique harms  
997 experienced by youth, and youth engagement and leadership in developing solutions throughout  
998 the pandemic response. To this end, consistent with extant literature [71,72], continued efforts  
999 should be made to include youth in research and policymaking by centering youth issues and  
1000 engaging with youth as equal stakeholders/rightsholders. A report by the Children and Youth in  
1001 Challenging Contexts (CYCC) Network (2013) offers best practices for engaging with youth to  
1002 address social exclusion and mitigate power imbalances by highlighting the importance of  
1003 collaboration [73]. Organizations, schools, and all levels of government should enhance capacity  
1004 for creating opportunities where youth can speak on relevant issues and be heard immediately.  
1005 The creation of student/youth advocacy groups and the development of government liaison  
1006 positions can help to bridge gaps and encourage political participation.

1007 Based on the current findings and the emerging literature, examples of solutions that  
1008 youth might propose to better address future pandemics and public health emergencies include  
1009 the use of verified, fact-checked social media posts to clearly communicate public health  
1010 information in a consistent manner [74,75], together with strategies to eliminate help-seeking  
1011 barriers and support system navigation [76,77]. Incorporating age-appropriate internet literacy  
1012 into school curricula to help cultivate critical thinking skills and discern factual information from  
1013 unreliable sources was also discussed. Free or affordable mental health services are needed, as  
1014 well as attention to accessibility needs. Attention should be given to enhancing access for those

1015 with minimal technological literacy skills [78]. Financial supports and means to safely socialize,  
1016 exercise, and alleviate symptoms of mental illness are additional youth priorities. In a similar  
1017 vein, resources should be distributed to address safety concerns for those in unsafe households,  
1018 who may be at risk of emotional or physical abuse during periods of lockdown. Additional novel  
1019 goals and solutions may be proposed through ongoing and appropriate youth engagement in  
1020 policy, service, and research design.

### 1021 *Strengths and limitations*

1022 This study provided longitudinal insights that capture a substantial period of change  
1023 during the evolving COVID-19 pandemic. Spanning multiple jurisdictions with large samples,  
1024 the study identified cross-cutting experiences reported by a wide variety of youth. With youth  
1025 engagement throughout, the research questions and approaches were informed by youth voices.  
1026 However, limitations of this study include varied sampling strategies and timelines across study  
1027 sites, complicating comparisons between sites, as well as attrition. While flexibility in sampling  
1028 strategies is a strength of qualitative longitudinal research design for reasons including enhancing  
1029 generalizability of findings, comparability can also be a limitation. The variability in recruitment  
1030 approaches across different sites may have hindered the ability to discern consistent patterns and  
1031 trends over time. Given the longitudinal nature of this study, participant numbers declined over  
1032 time. As the findings suggest, “COVID fatigue” may have contributed to study drop-out. Those  
1033 who chose to remain in the study may differ from those who did not complete all three timelines.  
1034 The use of virtual means to recruit and conduct the interviews expanded the geographical reach  
1035 of the study, but limited it to youth with online access.

### 1036 **Conclusion**

1037 This is the first known international longitudinal qualitative study to describe youth  
1038 experiences during the COVID-19 pandemic across two Canadian jurisdictions and Ireland, with  
1039 implications for policy and practice. Despite the many challenges encountered over the course of  
1040 the pandemic, youth reported aspects of growth. For this population, pre-existing stressors were  
1041 compounded by pandemic-related challenges and reduced access to care, signifying the  
1042 importance of prioritizing youth mental health moving forward. Areas of need highlighted  
1043 throughout the pandemic have implications for future policy decisions, with an opportunity to  
1044 enhance health and social service delivery. Investment in resources rooted in youth-identified  
1045 needs and priorities is vital to mitigate the long-term challenges associated with pandemic  
1046 trauma among youth.

## 1047 **Declaration of competing interests statement**

1048 The authors declare they have no competing interests.

## 1049 **Funding statement**

1050 This study was funded by the Canadian Institutes of Health Research Operating Grant #172661:  
1051 COVID-19 Rapid Research FO - Social Policy and Public Health Responses.

## 1052 **Acknowledgements**

1053 We are grateful to have conducted our research on the ancestral lands of many different  
1054 Indigenous Nations and Peoples across what we now call British Columbia and Ontario. We  
1055 would like to thank the youth participants, advisors, and research staff, who contributed valuable  
1056 insights and shared their experiences throughout the duration of this project. We would also like

1057 to acknowledge with gratitude the research teams at Jigsaw, the Centre for Addictions and  
1058 Mental Health, Foundry, and the University of British Columbia.

## 1059 **References**

- 1060 1. Mesman E, Vreeker A, Hillegers M. Resilience and mental health in children and  
1061 adolescents: An update of the recent literature and future directions. *Curr Opin Psychiatry*.  
1062 2021;34: 586–592.
- 1063 2. Callahan KL, Hilsenroth MJ, Yonai T, Waehler CA. Longitudinal stress responses to the  
1064 9/11 terrorist attacks in a New York metropolitan college sample. *Stress, Trauma, and*  
1065 *Crisis*. 2005;8: 45–60. doi:10.1080/15434610590913621
- 1066 3. Li J, Zweig KC, Brackbill RM, Farfel MR, Cone JE. Comorbidity amplifies the effects of  
1067 post-9/11 posttraumatic stress disorder trajectories on health-related quality of life.  
1068 *Quality of Life Research*. 2018;27: 651–660. doi:10.1007/s11136-017-1764-5
- 1069 4. Neria Y, DiGrande L, Adams BG. Posttraumatic stress disorder following the September  
1070 11, 2001, terrorist attacks: A review of the literature among highly exposed populations.  
1071 *American Psychologist*. 2011;66: 429–446. doi:10.1037/a0024791
- 1072 5. Roberts YH, Mitchell MJ, Witman M, Taffaro C. Mental health symptoms in youth  
1073 affected by Hurricane Katrina. *Prof Psychol Res Pr*. 2010;41: 10–18.  
1074 doi:10.1037/a0018339
- 1075 6. Weems CF, Taylor LK, Cannon MF, Marino RC, Romano DM, Scott BG, et al. Post  
1076 traumatic stress, context, and the lingering effects of the Hurricane Katrina disaster among  
1077 ethnic minority youth. *J Abnorm Child Psychol*. 2010;38: 49–56. doi:10.1007/s10802-  
1078 009-9352-y
- 1079 7. United Nations Department of Economic and Social Affairs. Definition of youth. United  
1080 Nations Inter-Agency Network on Youth Development. Available from:  
1081 <https://www.un.org/esa/socdev/documents/youth/fact-sheets/youth-definition.pdf>
- 1082 8. Hawke LD, Barbic SP, Voineskos A, Szatmari P, Cleverley K, Hayes E, et al. Impacts of  
1083 COVID-19 on youth mental health, substance use, and well-being: A rapid survey of  
1084 clinical and community samples: Répercussions de la COVID-19 sur la santé mentale,  
1085 l'utilisation de substances et le bien-être des adolescents : un sondage rapide  
1086 d'échantillons cliniques et communautaires. *The Canadian Journal of Psychiatry*. 2020;65:  
1087 701–709. doi:10.1177/0706743720940562
- 1088 9. Hawke LD, Sheikhan NY, MacCon K, Henderson J. Going virtual: Youth attitudes toward  
1089 and experiences of virtual mental health and substance use services during the COVID-19  
1090 pandemic. *BMC Health Serv Res*. 2021;21: 340. doi:10.1186/s12913-021-06321-7

- 1091 10. Al Omari O, Al Sabei S, Al Rawajfah O, Abu Sharour L, Aljohani K, Alomari K, et al.  
1092 Prevalence and predictors of depression, anxiety, and stress among youth at the time of  
1093 COVID-19: An online cross-sectional multicountry study. *Depress Res Treat.* 2020;2020:  
1094 1–9. doi:10.1155/2020/8887727
- 1095 11. Blackwell CK, Mansolf M, Sherlock P, Ganiban J, Hofheimer JA, Barone CJ, et al. Youth  
1096 well-being during the COVID-19 pandemic. *Pediatrics.* 2022;149. doi:10.1542/peds.2021-  
1097 054754
- 1098 12. Liang L, Ren H, Cao R, Hu Y, Qin Z, Li C, et al. The effect of COVID-19 on youth  
1099 mental health. *Psychiatr Q.* 2020;91: 841–852. doi:10.1007/s11126-020-09744-3
- 1100 13. Courtney D, Watson P, Battaglia M, Mulsant BH, Szatmari P. COVID-19 impacts on  
1101 child and youth anxiety and depression: Challenges and opportunities. *The Canadian*  
1102 *Journal of Psychiatry.* 2020;65: 688–691. doi:10.1177/0706743720935646
- 1103 14. Prowse R, Sherratt F, Abizaid A, Gabrys RL, Hellems KGC, Patterson ZR, et al.  
1104 Coping with the COVID-19 pandemic: Examining gender differences in stress and mental  
1105 Health among university students. *Front Psychiatry.* 2021;12.  
1106 doi:10.3389/fpsy.2021.650759
- 1107 15. Quinlan-Davidson M, Shan D, Courtney D, Barbic S, Cleverley K, Hawke LD, et al.  
1108 Associations over the COVID-19 pandemic period and the mental health and substance  
1109 use of youth not in employment, education or training in Ontario, Canada: a longitudinal,  
1110 cohort study. *Child Adolesc Psychiatry Ment Health.* 2023;17: 105. doi:10.1186/s13034-  
1111 023-00653-4
- 1112 16. Ertanir B, Kassis W, Garrote A. Longitudinal changes in Swiss adolescent’s mental health  
1113 outcomes from before and during the COVID-19 pandemic. *Int J Environ Res Public*  
1114 *Health.* 2021;18: 12734. doi:10.3390/ijerph182312734
- 1115 17. Hawes MT, Szenczy AK, Klein DN, Hajcak G, Nelson BD. Increases in depression and  
1116 anxiety symptoms in adolescents and young adults during the COVID-19 pandemic.  
1117 *Psychol Med.* 2022;52: 3222–3230. doi:10.1017/S0033291720005358
- 1118 18. Layman HM, Thorisdottir IE, Halldorsdottir T, Sigfusdottir ID, Allegrante JP,  
1119 Kristjansson AL. Substance use among youth during the COVID-19 pandemic: A  
1120 systematic review. *Curr Psychiatry Rep.* 2022;24: 307–324. doi:10.1007/s11920-022-  
1121 01338-z
- 1122 19. Hawke LD, Sheikhan NY, Oates S, Daley M, Dixon M, Henderson J. Impact Potpourri: A  
1123 Multimethod Survey Study on Youth Substance Use During COVID-19. *Canadian Journal*  
1124 *of Addiction.* 2022;13: 46–55. doi:10.1097/CXA.000000000000158
- 1125 20. Thorisdottir IE, Asgeirsdottir BB, Kristjansson AL, Valdimarsdottir HB, Jonsdottir  
1126 Tolgyes EM, Sigfusson J, et al. Depressive symptoms, mental wellbeing, and substance  
1127 use among adolescents before and during the COVID-19 pandemic in Iceland: a

- 1128 longitudinal, population-based study. *Lancet Psychiatry*. 2021;8: 663–672.  
1129 doi:10.1016/S2215-0366(21)00156-5
- 1130 21. Atlam E-S, Ewis A, El-Raouf MMA, Ghoneim O, Gad I. A new approach in identifying  
1131 the psychological impact of COVID-19 on university student’s academic performance.  
1132 *Alexandria Engineering Journal*. 2022;61: 5223–5233. doi:10.1016/j.aej.2021.10.046
- 1133 22. Sahu P. Closure of universities due to coronavirus disease 2019 (COVID-19): Impact on  
1134 education and mental health of students and academic staff. *Cureus*. 2020.  
1135 doi:10.7759/cureus.7541
- 1136 23. United Nations. Policy brief: Education during COVID-19 and beyond. 2020. Available  
1137 from: [https://www.un.org/development/desa/dspd/wp-](https://www.un.org/development/desa/dspd/wp-content/uploads/sites/22/2020/08/sg_policy_brief_covid-19_and_education_august_2020.pdf)  
1138 [content/uploads/sites/22/2020/08/sg\\_policy\\_brief\\_covid-](https://www.un.org/development/desa/dspd/wp-content/uploads/sites/22/2020/08/sg_policy_brief_covid-19_and_education_august_2020.pdf)  
1139 [19\\_and\\_education\\_august\\_2020.pdf](https://www.un.org/development/desa/dspd/wp-content/uploads/sites/22/2020/08/sg_policy_brief_covid-19_and_education_august_2020.pdf)
- 1140 24. Nandlall N, Hawke LD, Hayes E, Darnay K, Daley M, Relihan J, et al. Learning Through  
1141 a Pandemic: Youth Experiences With Remote Learning During the COVID-19 Pandemic.  
1142 *Sage Open*. 2022;12: 215824402211241. doi:10.1177/21582440221124122
- 1143 25. Deng Z, Arim R, Henseke G, Schoon I, Dietrich H, Murray A, et al. Youth unemployment  
1144 in Canada, Germany, Ireland, and the United Kingdom in times of COVID-19. 2022 Mar.  
1145 Available: [https://www150.statcan.gc.ca/n1/pub/36-28-0001/2022003/article/00003-](https://www150.statcan.gc.ca/n1/pub/36-28-0001/2022003/article/00003-eng.htm)  
1146 [eng.htm](https://www150.statcan.gc.ca/n1/pub/36-28-0001/2022003/article/00003-eng.htm)
- 1147 26. Benner AD, Mistry RS. Child development during the COVID-19 pandemic through a life  
1148 course theory lens. *Child Dev Perspect*. 2020;14: 236–243. doi:10.1111/cdep.12387
- 1149 27. Wolf K, Schmitz J. Scoping review: Longitudinal effects of the COVID-19 pandemic on  
1150 child and adolescent mental health. *Eur Child Adolesc Psychiatry*. 2023.  
1151 doi:10.1007/s00787-023-02206-8
- 1152 28. Buizza C, Bazzoli L, Ghilardi A. Changes in college students mental health and lifestyle  
1153 during the COVID-19 pandemic: A systematic review of longitudinal studies. *Adolesc*  
1154 *Res Rev*. 2022;7: 537–550. doi:10.1007/s40894-022-00192-7
- 1155 29. Liu SR, Davis EP, Palma AM, Sandman CA, Glynn LM. The acute and persisting impact  
1156 of COVID-19 on trajectories of adolescent depression: Sex differences and social  
1157 connectedness. *J Affect Disord*. 2022;299: 246–255. doi:10.1016/j.jad.2021.11.030
- 1158 30. McGorry PD, Mei C, Chanen A, Hodges C, Alvarez-Jimenez M, Killackey E. Designing  
1159 and scaling up integrated youth mental health care. *World Psychiatry*. 2022;21: 61–76.
- 1160 31. Hawke LD, Szatmari P, Cleverley K, Courtney D, Cheung A, Voineskos AN, et al. Youth  
1161 in a pandemic: A longitudinal examination of youth mental health and substance use  
1162 concerns during COVID-19. *BMJ Open*. 2021;11: e049209. doi:10.1136/bmjopen-2021-  
1163 049209

- 1164 32. Hawke LD, Koyama E, Henderson J. Cannabis use, other substance use, and co-occurring  
1165 mental health concerns among youth presenting for substance use treatment services: Sex  
1166 and age differences. *J Subst Abuse Treat.* 2018;91: 12–19. doi:10.1016/j.jsat.2018.05.001
- 1167 33. Henderson JL, Brownlie EB, McMains S, Chaim G, Wolfe DA, Rush B, et al. Enhancing  
1168 prevention and intervention for youth concurrent mental health and substance use  
1169 disorders: The Research and Action for Teens study. *Early Interv Psychiatry.* 2019;13:  
1170 110–119. doi:10.1111/eip.12458
- 1171 34. Henderson JL, Cheung A, Cleverley K, Chaim G, Moretti ME, de Oliveira C, et al.  
1172 Integrated collaborative care teams to enhance service delivery to youth with mental  
1173 health and substance use challenges: protocol for a pragmatic randomised controlled trial.  
1174 *BMJ Open.* 2017;7: e014080. doi:10.1136/bmjopen-2016-014080
- 1175 35. Mathias S, Tee K, Helfrich W, Gerty K, Chan G, Barbic SP. Foundry: Early learnings  
1176 from the implementation of an integrated youth service network. *Early Interv Psychiatry.*  
1177 2022;16: 410–418. doi:10.1111/eip.13181
- 1178 36. Hawke LD, Szatmari P, Cleverley K, Courtney D, Cheung A, Voineskos AN, et al. Youth  
1179 in a pandemic: A longitudinal examination of youth mental health and substance use  
1180 concerns during COVID-19. *BMJ Open.* 2021;11: e049209. doi:10.1136/bmjopen-2021-  
1181 049209
- 1182 37. Hamilton CB, Hoens AM, Backman CL, McKinnon AM, McQuitty S, English K, et al.  
1183 An empirically based conceptual framework for fostering meaningful patient engagement  
1184 in research. *Health Expectations.* 2018;21: 396–406. doi:10.1111/hex.12635
- 1185 38. Hawke LD, Relihan J, Miller J, McCann E, Rong J, Darnay K, et al. Engaging youth in  
1186 research planning, design and execution: Practical recommendations for researchers.  
1187 *Health Expectations.* 2018;21: 944–949. doi:10.1111/hex.12795
- 1188 39. Vears DF, Gillam L. Inductive content analysis: A guide for beginning qualitative  
1189 researchers. *Focus on Health Professional Education: A Multi-Professional Journal.*  
1190 2022;23: 111–127. doi:10.11157/fohpe.v23i1.544
- 1191 40. Lumivero. NVivo (Version 12). 2017. Available from:  
1192 <https://lumivero.com/products/nvivo/>
- 1193 41. Mathieu E, Ritchie H, Rodés-Guirao L, Appel C, Giattino C, Hasell J, et al. Coronavirus  
1194 Pandemic (COVID-19). In: *Our World in Data* [Internet]. 2020 [cited 15 Nov 2023].  
1195 Available: <https://ourworldindata.org/coronavirus>
- 1196 42. Chiodo D, Lu S, Varatharajan T, Costello J, Rush B, Henderson JL. Barriers and  
1197 facilitators to the implementation of an integrated youth services network in Ontario. *Int J*  
1198 *Integr Care.* 2022;22. doi:10.5334/ijic.6737
- 1199 43. Statistics Canada. COVID-19 epidemiology update: Current situation. 2023 Nov.  
1200 Available from: <https://health-infobase.canada.ca/covid-19/>

- 1201 44. Velez G, Hahn M, Troyer B. Making meaning of COVID-19: An exploratory analysis of  
1202 U.S. adolescent experiences of the pandemic. *Transl Issues Psychol Sci.* 2022;8: 269–281.  
1203 doi:10.1037/tps0000326
- 1204 45. Bell IH, Nicholas J, Broomhall A, Bailey E, Bendall S, Boland A, et al. The impact of  
1205 COVID-19 on youth mental health: A mixed methods survey. *Psychiatry Res.* 2023;321:  
1206 115082. doi:10.1016/j.psychres.2023.115082
- 1207 46. Dhawan S. Online learning: A panacea in the time of COVID-19 crisis. *Journal of*  
1208 *Educational Technology Systems.* 2020;49: 5–22. doi:10.1177/0047239520934018
- 1209 47. Hamid R, SENTRYO I, Hasan S. Online learning and its problems in the Covid-19  
1210 emergency period. *Jurnal Prima Edukasia.* 2020;8: 86–95. doi:10.21831/jpe.v8i1.32165
- 1211 48. Nambiar D. The impact of online learning during COVID-19: students’ and teachers’  
1212 perspective. *The International Journal of Indian Psychology.* 2020;8: 783–793.
- 1213 49. Hlasny V, AlAzzawi S. Last in after COVID-19: Employment prospects of youths during  
1214 a pandemic recovery. *Forum for Social Economics.* 2022;51: 235–244.  
1215 doi:10.1080/07360932.2022.2052738
- 1216 50. Piltch-Loeb R, Merdjanoff A, Meltzer G. Anticipated mental health consequences of  
1217 COVID-19 in a nationally-representative sample: Context, coverage, and economic  
1218 consequences. *Prev Med (Baltim).* 2021;145: 106441. doi:10.1016/j.ypmed.2021.106441
- 1219 51. Roberts JD, Dickinson KL, Koebele E, Neuberger L, Banacos N, Blanch-Hartigan D, et  
1220 al. Clinicians, cooks, and cashiers: Examining health equity and the COVID-19 risks to  
1221 essential workers. *Toxicol Ind Health.* 2020;36: 689–702.  
1222 doi:10.1177/0748233720970439
- 1223 52. Reny TT, Barreto MA. Xenophobia in the time of pandemic: othering, anti-Asian  
1224 attitudes, and COVID-19. *Polit Groups Identities.* 2022;10: 209–232.  
1225 doi:10.1080/21565503.2020.1769693
- 1226 53. Le TK, Cha L, Han H-R, Tseng W. Anti-Asian xenophobia and Asian American COVID-  
1227 19 disparities. *Am J Public Health.* 2020;110: 1371–1373.  
1228 doi:10.2105/AJPH.2020.305846
- 1229 54. Huang J, Liu R. Xenophobia in America in the age of Coronavirus and beyond. *J Vasc*  
1230 *Interv Radiol.* 2020;31: 1187–1188. doi:10.1016/j.jvir.2020.04.020
- 1231 55. Dror AA, Eisenbach N, Taiber S, Morozov NG, Mizrahi M, Zigron A, et al. Vaccine  
1232 hesitancy: The next challenge in the fight against COVID-19. *Eur J Epidemiol.* 2020;35:  
1233 775–779. doi:10.1007/s10654-020-00671-y
- 1234 56. Everest L, Henderson J, Prebeg M, Relihan J, Ma C, Hawke LD. Relationship between  
1235 mental health on COVID-19 vaccine hesitancy in youth: A mixed methods longitudinal  
1236 cohort study. Submitted manuscript.

- 1237 57. Hawke L, LD, DM, RJ, SP, HJ. Reaching youth with reliable information during the  
1238 COVID-19 pandemic: Social media for sure. Forthcoming.
- 1239 58. Murphy J, Vallières F, Bentall RP, Shevlin M, McBride O, Hartman TK, et al.  
1240 Psychological characteristics associated with COVID-19 vaccine hesitancy and resistance  
1241 in Ireland and the United Kingdom. *Nat Commun.* 2021;12: 29. doi:10.1038/s41467-020-  
1242 20226-9
- 1243 59. Sallam M. COVID-19 vaccine hesitancy worldwide: A concise systematic review of  
1244 vaccine acceptance rates. *Vaccines (Basel).* 2021;9: 160. doi:10.3390/vaccines9020160
- 1245 60. Troiano G, Nardi A. Vaccine hesitancy in the era of COVID-19. *Public Health.* 2021;194:  
1246 245–251. doi:10.1016/j.puhe.2021.02.025
- 1247 61. Roberts A, Rogers J, Mason R, Siriwardena AN, Hogue T, Whitley GA, et al. Alcohol and  
1248 other substance use during the COVID-19 pandemic: A systematic review. *Drug Alcohol*  
1249 *Depend.* 2021;229: 109150. doi:10.1016/j.drugalcdep.2021.109150
- 1250 62. Loades ME, Chatburn E, Higson-Sweeney N, Reynolds S, Shafran R, Brigden A, et al.  
1251 Rapid systematic review: The impact of social isolation and loneliness on the mental  
1252 health of children and adolescents in the context of COVID-19. *J Am Acad Child Adolesc*  
1253 *Psychiatry.* 2020;59: 1218-1239.e3. doi:10.1016/j.jaac.2020.05.009
- 1254 63. O’Sullivan K, Clark S, McGrane A, Rock N, Burke L, Boyle N, et al. A qualitative study  
1255 of child and adolescent mental health during the COVID-19 pandemic in Ireland. *Int J*  
1256 *Environ Res Public Health.* 2021;18: 1062. doi:10.3390/ijerph18031062
- 1257 64. Pujolar G, Oliver-Anglès A, Vargas I, Vázquez M-L. Changes in access to health services  
1258 during the COVID-19 pandemic: A scoping review. *Int J Environ Res Public Health.*  
1259 2022;19: 1749. doi:10.3390/ijerph19031749
- 1260 65. Chadi N, Ryan NC, Geoffroy M-C. COVID-19 and the impacts on youth mental health:  
1261 Emerging evidence from longitudinal studies. *Canadian Journal of Public Health.*  
1262 2022;113: 44–52. doi:10.17269/s41997-021-00567-8
- 1263 66. Vanaken G-J, Danckaerts M. Impact of green space exposure on children’s and  
1264 adolescents’ mental health: A systematic review. *Int J Environ Res Public Health.*  
1265 2018;15: 2668. doi:10.3390/ijerph15122668
- 1266 67. Beyer KMM, Kaltenbach A, Szabo A, Bogar S, Nieto FJ, Malecki KM. Exposure to  
1267 neighborhood green space and mental health: evidence from the survey of the health of  
1268 Wisconsin. *Int J Environ Res Public Health.* 2014;11: 3453–72.  
1269 doi:10.3390/ijerph110303453
- 1270 68. Bustamante G, Guzman V, Kobayashi LC, Finlay J. Mental health and well-being in times  
1271 of COVID-19: A mixed-methods study of the role of neighborhood parks, outdoor spaces,  
1272 and nature among US older adults. *Health Place.* 2022;76: 102813.  
1273 doi:10.1016/j.healthplace.2022.102813

- 1274 69. Vazquez C, Valiente C, García FE, Contreras A, Peinado V, Trucharte A, et al. Post-  
1275 traumatic growth and stress-related responses during the COVID-19 Pandemic in a  
1276 national representative sample: The role of positive core beliefs about the world and  
1277 others. *J Happiness Stud.* 2021;22: 2915–2935. doi:10.1007/s10902-020-00352-3
- 1278 70. Menculini G, Albert U, Bianchini V, Carmassi C, Carrà G, Cirulli F, et al. Did we learn  
1279 something positive out of the COVID-19 pandemic? Post-traumatic growth and mental  
1280 health in the general population. *European Psychiatry.* 2021;64: e79.  
1281 doi:10.1192/j.eurpsy.2021.2263
- 1282 71. Allemang B, Cullen O, Schraeder K, Pintson K, Dimitropoulos G. Recommendations for  
1283 youth engagement in Canadian mental health research in the context of COVID-19. *J Can  
1284 Acad Child Adolesc Psychiatry.* 2021;30: 123–130.
- 1285 72. Efuribe C, Barre-Hemingway M, Vaghefi E, Suleiman AB. Coping with the COVID-19  
1286 crisis: A call for youth engagement and the inclusion of young people in matters that  
1287 affect their lives. *J Adolesc Health.* 2020;67: 16–17. doi:10.1016/j.jadohealth.2020.04.009
- 1288 73. Children and Youth in Challenging Contexts Network. Youth engagement: Empowering  
1289 youth voices to improve services, programs, and policy. 2013. Available from:  
1290 [https://youthdatingviolence.prevnet.ca/wp-content/uploads/2020/01/ydv-tools-yf-youth-  
1291 engagement-summary-en.pdf](https://youthdatingviolence.prevnet.ca/wp-content/uploads/2020/01/ydv-tools-yf-youth-engagement-summary-en.pdf)
- 1292 74. Moorhead SA, Hazlett DE, Harrison L, Carroll JK, Irwin A, Hoving C. A new dimension  
1293 of health care: Systematic review of the uses, benefits, and limitations of social media for  
1294 health communication. *J Med Internet Res.* 2013;15: e85. doi:10.2196/jmir.1933
- 1295 75. Taggart T, Grewe ME, Conserve DF, Gliwa C, Roman Isler M. Social Media and HIV: A  
1296 systematic review of uses of social Media in HIV communication. *J Med Internet Res.*  
1297 2015;17: e248. doi:10.2196/jmir.4387
- 1298 76. Gulliver A, Griffiths KM, Christensen H. Perceived barriers and facilitators to mental  
1299 health help-seeking in young people: a systematic review. *BMC Psychiatry.* 2010;10: 113.  
1300 doi:10.1186/1471-244X-10-113
- 1301 77. Ijadi-Maghsoodi R, Bonnet K, Feller S, Nagaran K, Puffer M, Kataoka S. Voices from  
1302 minority youth on help-seeking and barriers to mental health services: Partnering with  
1303 school-based health centers. *Ethn Dis.* 2018;28: 437–444. doi:10.18865/ed.28.S2.437
- 1304 78. Council of Canadian Academies. Fault lines: Expert panel on the socioeconomic impacts  
1305 of science and health misinformation. Ottawa; 2023. Available from: [https://cca-  
1306 reports.ca/wp-content/uploads/2023/02/Report-Fault-Lines-digital.pdf](https://cca-reports.ca/wp-content/uploads/2023/02/Report-Fault-Lines-digital.pdf)

1307

1308

1309 **Appendix A. Semi-structured interview guides**

1310 T1 Interview Guide:

- 1311 1. How would you describe your life before COVID-19 started?
- 1312 a. Were you in school? Working? How much/often
- 1313 b. How was your social life?
- 1314 c. Hobbies?/activities
- 1315 d. Day in the life?
- 1316 2. How would you describe your life now, in COVID-19 times?
- 1317 3. As a young person, how has COVID-19 affected your everyday life?
- 1318 a. Has COVID-19 had any positive impacts on your life? What kinds of
- 1319 impacts?
- 1320 b. Has COVID-19 had any negative impacts on your life? What kinds of
- 1321 impacts?
- 1322 4. What would you be doing different in your life now if it weren't for COVID-19?
- 1323 5. Many services for youth have changed in response to the COVID-19 pandemic.
- 1324 a. What were you accessing before COVID and what has changed for you?
- 1325 b. How could the changes have been better?
- 1326 c. Have you used virtual services? Why or why not have you accessed? What
- 1327 kind of services? How have they been working? What kind of remote
- 1328 technology have you used? (phone, text, video).
- 1329 6. How hopeful are you feeling about Canada's recovery from COVID-19?
- 1330 7. What activities are meaningful for you or other youth to engage in to make a
- 1331 difference during the COVID-19 crisis?

- 1332 8. What kinds of informational resources could you or other youth benefit from during  
1333 the COVID-19 crisis?
- 1334 9. How do you see your post-pandemic life?
- 1335 10. As a young person, you may be of thinking about your future, for example school,  
1336 career path, etc.
- 1337 a. How has your planning process changed due to COVID-19?  
1338 b. How have your plans changed?
- 1339 11. Imagine your life two years from now. How do you think COVID-19 will have  
1340 impacted your life in five years?
- 1341 12. Imagine your life five years from now. How do you think COVID-19 will have  
1342 impacted your life in ten years?
- 1343 13. How do you think youth see the pandemic and how seriously they are taking things?
- 1344 14. What positive contributions are youth making to the pandemic situation?
- 1345 15. Do you think young people can play a role in planning the response to this pandemic  
1346 and future pandemics? What kind of role? What would this look like?
- 1347 16. What role do you think youth are playing in decision-making (policy making, service  
1348 planning) and how has that impacted the pandemic?
- 1349 17. If you could make any suggestion to improve the pandemic response for youth, what  
1350 would that be?
- 1351 a. Did the government response help you directly? Was the information easy to  
1352 understand?

1353

1354 T2 Interview Guide:

1355

1356 1. How would you describe your life since the last time you were interviewed? Has

1357 anything changed for you?

1358 a. During the last interview, you were asked about school/college, or if you are  
1359 employed... how has that changed for you, if at all?

1360 b. During the last interview, you were asked about your current social life...  
1361 [you were missing friends, you have maintained an average social life, etc]...  
1362 has that changed? How?

1363 c. During your last interview, you were asked about your hobbies or activities  
1364 you enjoy and may not be able to do. Has that changed for you? How?

1365 d. Are you living in a rural area, town, or city? [Base next part off of their  
1366 answer] Do you think living [*rural/in a town/city/village*] made your  
1367 experience of COVID any different?

1368 2. Since your last interview, as your experiences of life during the COVID-19 pandemic  
1369 changed in any other way?

1370 a. Has COVID-19 had any positive impacts on your life since the summer? What  
1371 kinds of impacts?

1372 b. Has COVID-19 had any negative impacts on your life since the summer?  
1373 What kinds of impacts?

1374 3. During your last interview, you were asked what you would be doing differently in  
1375 your life if it weren't for COVID-19. What (or what else) would you be doing now if  
1376 it weren't for COVID-19?

- 1377 4. During your last interview, you were asked about services you may have used  
1378 before/during COVID, and what it's been like to use them.
- 1379 a. Have you been using services during COVID-19? Have you used mental  
1380 health services, specifically?
- 1381 b. Since your last interview, have you continued using this service, or others, on  
1382 a regular basis? Did you start or stop using any other services since your last  
1383 interview?
- 1384 c. Since your last interview, have there been any additional changes to this  
1385 service? What are your thoughts on those?
- 1386 d. *If relevant*, how was finishing up with that service during COVID for you?
- 1387 e. *If relevant and using a new service*
- 1388 i. Why did you decide to use these services?
- 1389 ii. What kind of support were you offered? (e.g., phone, video, F2F)
- 1390 iii. What did you find most helpful about these services?
- 1391 iv. What did you find least helpful?
- 1392 v. What were your expectations of the service? Were they met?
- 1393 vi. Were you satisfied with the services/would you recommend to a  
1394 friend?
- 1395 f. Is there anything about that service that you didn't mention the last time that  
1396 you would like to talk about?
- 1397 5. Something we are interested in is how mental health services have changed during the  
1398 pandemic, including having more experience and capacity in providing online  
1399 services.

- 1400 a. Do you think online services like this should continue to be offered after the  
1401 pandemic?
- 1402 b. What would this look like when in-person services resume?
- 1403 c. Over the course of the pandemic, has your opinion about online services  
1404 changed?
- 1405 6. Do you have any more ideas about how service providers could make it easier for  
1406 young people to engage with mental health services?
- 1407 7. During your last interview, you might remember that you were asked about Canada's  
1408 recovery from COVID-19. How hopeful do you feel about that now?
- 1409 a. Compared to how you felt during your last interview, why are you feeling  
1410 more hopeful/less hopeful now?
- 1411 b. What would make you feel more hopeful? Less hopeful?
- 1412 8. During your last interview, there may not have been a vaccine available for COVID-  
1413 19. Now vaccines are slowly being rolled out across Canada.
- 1414 a. How do you feel about the vaccine?
- 1415 b. Where have you been getting information about the vaccine?
- 1416 c. Have you gotten it, or do you plan to get it? Why/why not?
- 1417 d. What has influenced your opinion about the vaccine?
- 1418 i. What might make you excited to get the vaccine?
- 1419 ii. What might make you hesitant about the vaccine?
- 1420 e. How is this affected by your [identity factor]
- 1421 f. What about people in your family and social circles? What are they saying  
1422 about the vaccine? How is this influencing your perspectives?

- 1423 g. What kinds of informational materials do youth need to make good decisions  
1424 about the vaccine?
- 1425 h. Do you have any other thoughts to share with us about the vaccine?
- 1426 9. During your last interview, you were asked about your life after COVID-19. How do  
1427 you see your post-pandemic life now?
- 1428 a. Since your last interview, has anything about your plans for after COVID-19?  
1429 b. Do you see COVID-19 having lasting impacts in our society? If yes, what  
1430 would this look like? How would these affect your everyday life?  
1431 c. You were asked before, but just in case anything has changed... Imagine your  
1432 life five years from now. How do you think COVID-19 will have impacted  
1433 your life in five years?  
1434 d. Imagine your life ten years from now. How do you think COVID-19 will have  
1435 impacted your life in ten years?
- 1436 10. Finally, you might remember during your last interview, you were asked about how  
1437 you think young people see the pandemic. Since then, do you think anything has  
1438 changed about how young people see the pandemic and how seriously they're taking  
1439 things?
- 1440 a. What contributions are young people making now? Negative/positive?  
1441 b. Do you think there is anything different about the role young people are  
1442 playing in decision-making (policy making, service planning)?  
1443 c. Is there anything else about how young people get information about COVID-  
1444 19 that you think would be helpful to say?

1445 d. What would you say now about the role young people play in planning a  
1446 response to a pandemic?

1447 e. If you could make any suggestion to improve the pandemic response for  
1448 young people, what would that be?

1449 11. Is there anything else we haven't covered that you would like to add or think we  
1450 would be interested?

1451 12. Do you have any questions?

1452 T3 Interview Guide:

1453 1. How would you describe your life since the last time we spoke? Has anything  
1454 changed for you?

1455 a. The last time we spoke you told me you were in  
1456 school/college/working/unemployed...how has that changed for you, if at all?

1457 b. Last we spoke you told me [you were missing friends/had an average social life,  
1458 etc]...has that changed? How?

1459 c. Last time we spoke, you told me you enjoyed/weren't able to do  
1460 [hobbies/activities]...has that changed for you? How?

1461 d. Are you still living in a rural area, town or city? Do you think living [*rural/in a*  
1462 *town/city/village*] made your experience of COVID any different?

1463 **NB. If young person disclosed any relevant identity factor, interviewer will**  
1464 **explore how this might have affected their experience throughout the**  
1465 **interview**

1466 2. Has your experiences of life during the COVID-19 pandemic changed in any other  
1467 way since the last time we spoke?

- 1468 a. Has COVID-19 had any positive impacts on your life since the we last spoke?  
1469 What kinds of impacts?
- 1470 b. Has COVID-19 had any negative impacts on your life since the we last spoke?  
1471 What kinds of impacts?
- 1472 c. We've heard from some young people that grieving has been different during  
1473 the pandemic, for example grieving for the loss of a loved one. Have you been  
1474 affected by grief during the pandemic? How has this gone? How has it been  
1475 different due to the pandemic?
- 1476 d. Last time we spoke, Covid-19 rates were quite high in [insert country]. How  
1477 do you think people with Covid-19 are perceived? Do you think where people  
1478 are from (I.e. city or countryside) influences their opinion Covid-19?
- 1479 3. How would you describe your mental health since we last spoke?
- 1480 a. General probes: (If it improved, what factors led to that improvement? If it  
1481 declined, what lead to the decline?)
- 1482 4. How would you describe your substance use since we last spoke?
- 1483 a. General probes: (How has it changed? If it increased, what factors led to that  
1484 improvement? If it declined, what lead to the decline?)
- 1485 i. Remember to probe based on the substance (e.g. cocaine use may  
1486 decrease, but cannabis use may increase, etc.)
- 1487 5. There has been a lot of discussion about mental health during COVID-19. How do  
1488 you think this has affected people's attitudes about mental health?
- 1489 a. General probes: (How have they changed? If improved, what factors led to  
1490 that improvement? If worse, what lead to the decline?)

- 1491 i. Probe stigma
- 1492 6. The last time we spoke, we talked about what you would be doing differently in your  
1493 life if it weren't for COVID-19. What (or what else) would you be doing now if it  
1494 weren't for COVID-19?
- 1495 7. The last time we spoke, we talked about how services for young people have changed  
1496 in response to the COVID-19 pandemic. (At the time, you told me about what it was  
1497 like to use [previously mentioned service], before/during COVID...)
- 1498 a. Have you continued using this service/started using this service again/finished  
1499 engaging with this service since we last spoke?
- 1500 b. Have there been any additional changes to this service since we last spoke?  
1501 What are your thoughts on those?
- 1502 c. Some new services have been created during COVID-19. Have you heard of  
1503 any new services in your community? What kind of services (e.g., virtual, in  
1504 person, specific cultural groups, etc.)? How has this affected your access to  
1505 services?
- 1506 d. *If relevant*, how was finishing up with that service during COVID for you?
- 1507 e. *If relevant and using a new service*
- 1508 i. Why did you decide to use these services?
- 1509 ii. What kind of support were you offered? (e.g., phone, video, F2F)
- 1510 iii. What did you find most helpful about these services?
- 1511 iv. What did you find least helpful?
- 1512 v. What were your expectations of the service? Were they met?

- 1513 vi. Were you satisfied with the services/would you recommend to a  
1514 friend?
- 1515 f. *If relevant and using any MH service:*
- 1516 i. How did the restrictions affect your ability to benefit from the  
1517 services? For example, if you were learning new skills in therapy,  
1518 were you able to apply them when we were under restrictions? How  
1519 might your experience with this have been different due to COVID-  
1520 19?
- 1521 g. Is there anything about that service that we didn't chat about the last time that  
1522 you would like to tell me about?
- 1523 8. The last time we spoke, we talked about how many mental health services now have  
1524 more experience and capacity to provide online services and whether you thought  
1525 online services should continue to be available after the pandemic. Has your opinion  
1526 about this changed at all?
- 1527 9. Do you have any more ideas about how we could make it easier for young people to  
1528 engage with mental health services?
- 1529 10. In addition to using services virtually, many young people are using technology more  
1530 than they were before the pandemic: personally, at work, in services and in other  
1531 areas of life. How is this impacting you? Do you think this is a positive or a negative  
1532 change? Why?
- 1533 11. You might remember that we talked about Ireland/Canada's recovery from COVID-  
1534 19 the last time we spoke. How hopeful do you feel about that now?

- 1535 a. Why are you feeling more hopeful/less hopeful now that you were when we  
1536 last spoke?
- 1537 b. What would make you feel more hopeful? Less hopeful?  
1538
- 1539 12. Since the last time we talked, there have been changes in how available COVID-19  
1540 vaccines are and in how many people have received them..
- 1541 a. Have you gotten it, or do you plan to get it? Why/why not?  
1542 b. How have your thoughts on the vaccine changed? What caused them to  
1543 change?  
1544 c. What about people in your family and social circles? Have their perspectives  
1545 on the vaccine changed? How is this influencing your perspectives?  
1546 d. Do you have any other thoughts to share with us about the vaccine?
- 1547 13. The last time we met, we talked about your life after COVID-19. How do you see  
1548 your post-pandemic life now?
- 1549 14. Has anything about your plans for after COVID-19 changed since the last time we  
1550 spoke?
- 1551 15. As society opens back up, we'll all be returning to in-person activities soon. How do  
1552 you feel about this? Is there anything about this that makes you feel positive or  
1553 hopeful? Is there anything about this that makes you feel afraid or nervous?
- 1554 16. Do you see COVID-19 having lasting impacts in our society? If yes, what would this  
1555 look like? How would these affect your everyday life?
- 1556 17. I asked you this question before, but I will ask it again... Imagine your life five years  
1557 from now. How do you think COVID-19 will have impacted your life in five years?

- 1558           18. Imagine your life ten years from now. How do you think COVID-19 will have  
1559           impacted your life in ten years?
- 1560           19. Finally, you might remember the last time we met we talked about how young people  
1561           see the pandemic. Do you think anything has changed about how young people see  
1562           the pandemic and how seriously are they taking things?
- 1563           a. What contributions are young people making now? Negative/positive?
- 1564           b. Do you think there is anything different about the role young people are playing in  
1565           decision-making (policy making, service planning)?
- 1566           c. What would you say now about the role young people play in planning a response  
1567           to a pandemic?
- 1568           d. If you could make any suggestion to improve the pandemic response for young  
1569           people, what would that be?
- 1570           e. Is there anything else about how young people get information about COVID-19  
1571           that you think would be helpful to say?
- 1572           20. Is there anything else we haven't covered that you would like to add or think we should  
1573           know?
- 1574           21. Do you have any questions?
